# Supplementary material for: Flexible cycloalkyl-substituted N-heterocyclic carbenes
Source: Royal Society of Chemistry journal article supplement (doi:10.1039/c003214j), 2010-01-01
Supplement: c003214j.pdf [file c003214j.pdf]

## Supporting Information

for

# Flexible Cycloalkyl-substituted *N*-heterocyclic Carbenes.

*George C. Fortman, Alexandra M. Z. Slawin, Steven P. Nolan\**

School of Chemistry, University of St. Andrews, St. Andrews, Scotland KY16 9ST

Table of contents

|                                                           |         |
|-----------------------------------------------------------|---------|
| $^1\text{H}$ and $^{13}\text{C}$ NMR Spectra of Complexes | S3-S10  |
| FTIR Spectra of Ir(NHC)(CO) $_2$ Cl Complexes             | S11-S12 |
| SambVa Output                                             | S13-S19 |
| Crystallographic Tables                                   | S20-S21 |

# $^1\text{H}$ & $^{13}\text{C}$ NMR

## *cis*-Pt(ICy<sup>7</sup>)<sub>2</sub>Me<sub>2</sub>

SpinWorks 3: 08122009-14-georgeR Pt(IHept)Me2 (C6D6)

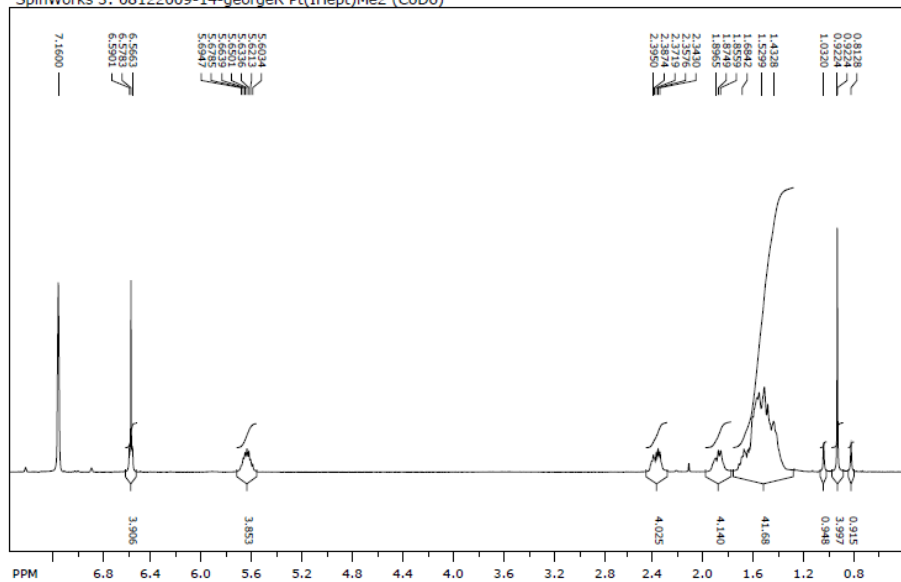

file: ...rent\08122009-14-projects1R\10\fid expt: <zg>  
transmitter freq.: 300.061800 MHz  
time domain size: 32768 points  
width: 4194.63 Hz = 13.9792 ppm = 0.128010 Hz/pt  
number of scans: 16

freq. of 0 ppm: 300.060029 MHz  
processed size: 32768 complex points  
LB: 0.300 GF: 0.0000  
Hz/cm: 86.361 ppm/cm: 0.28781

SpinWorks 3: 08122009-15-georgeR 13C Pt(ICy7)2Me2 (C6D6)

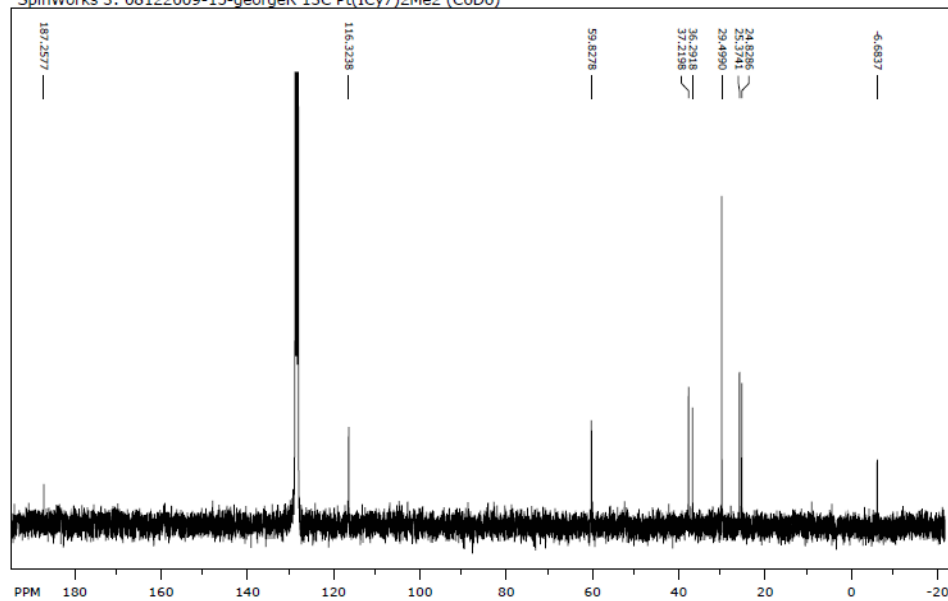

file: ...August\08122009-15-georgeR\11\fid expt: <zgpg30>  
transmitter freq.: 75.457662 MHz  
time domain size: 65536 points  
width: 22675.74 Hz = 300.5094 ppm = 0.346004 Hz/pt  
number of scans: 800

freq. of 0 ppm: 75.450100 MHz  
processed size: 65536 complex points  
LB: 1.000 GF: 0.0000  
Hz/cm: 655.984 ppm/cm: 8.69340

*cis*-Pt(ICy<sup>8</sup>)<sub>2</sub>Me<sub>2</sub>

SpinWorks 3: 08252009-27-georgeM Pt(ICy8)2Me2 (C6D6)

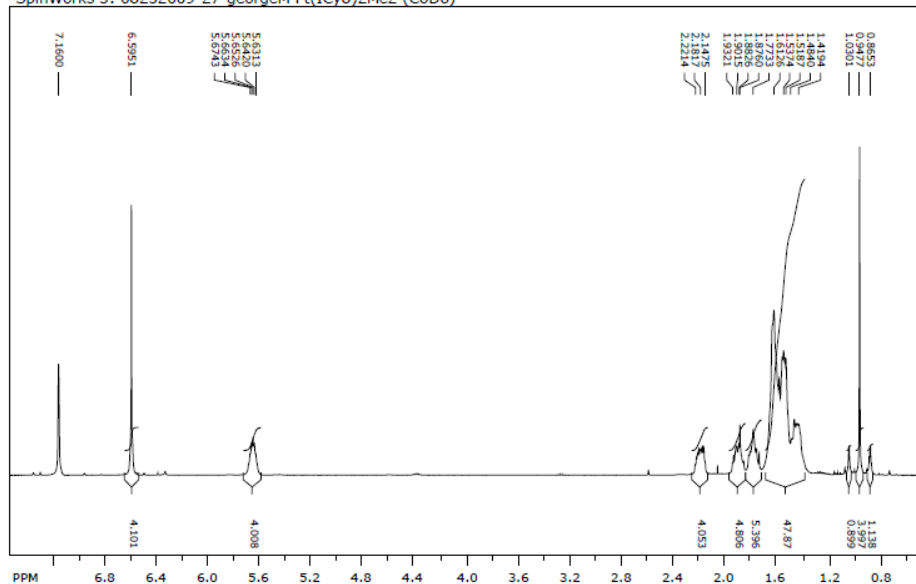

file: ...\_August\08252009-27-georgeM\10\fid exp: <zg>  
transmitter freq.: 400.132401 MHz  
time domain size: 65536 points  
width: 5597.01 Hz = 13.9879 ppm = 0.085404 Hz/pt  
number of scans: 16

freq. of 0 ppm: 400.130043 MHz  
processed size: 32768 complex points  
LB: 0.300 GF: 0.0000  
Hz/cm: 113.167 ppm/cm: 0.28287

SpinWorks 3: 08252009-27-georgeM 13C Pt(ICy8)2Me2 (C6D6)

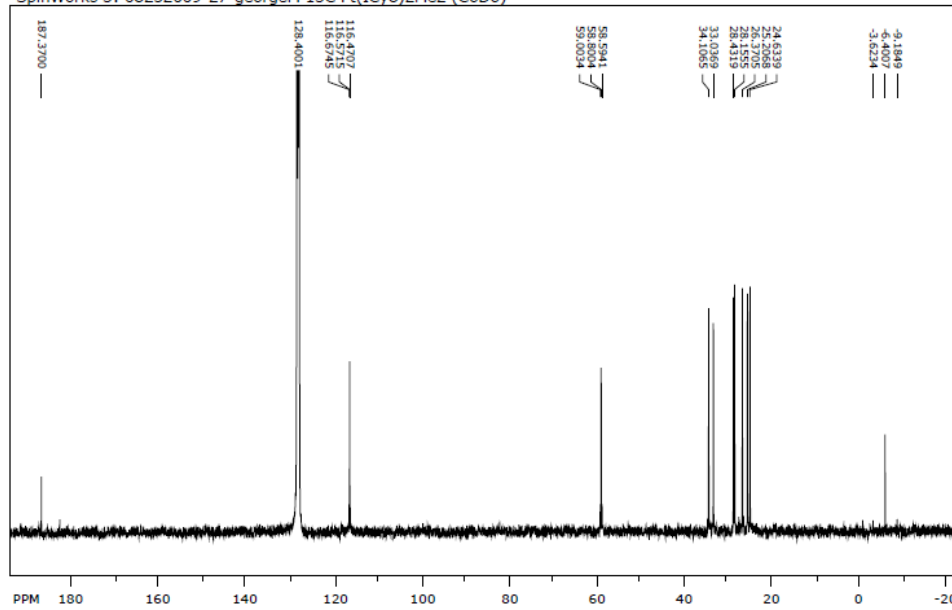

file: ...\_August\08252009-27-georgeM\11\fid exp: <zgpg30>  
transmitter freq.: 100.622830 MHz  
time domain size: 65536 points  
width: 29761.90 Hz = 295.7769 ppm = 0.454131 Hz/pt  
number of scans: 800

freq. of 0 ppm: 100.612707 MHz  
processed size: 32768 complex points  
LB: 2.000 GF: 0.0000  
Hz/cm: 871.742 ppm/cm: 8.66346

*cis*-Pt(ICy<sup>12</sup>)<sub>2</sub>Me<sub>2</sub>

SpinWorks 3: Pt(ICy12)2Me2

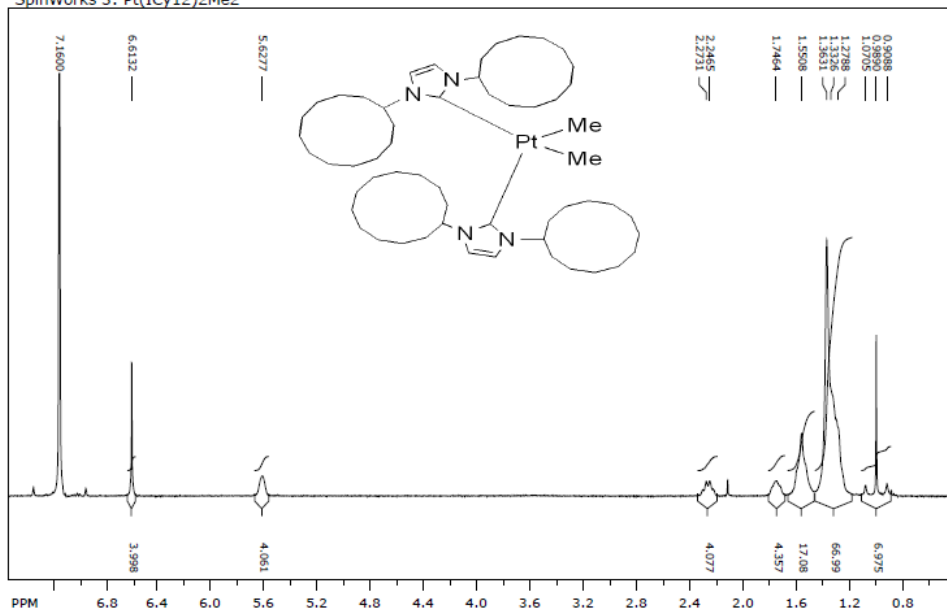

file: ...October\10132009-7-georgeM\10\fid exp: <zg30>  
 transmitter freq.: 400.132401 MHz  
 time domain size: 65536 points  
 width: 5597.01 Hz = 13.9879 ppm = 0.085404 Hz/pt  
 number of scans: 8

freq. of 0 ppm: 400.130043 MHz  
 processed size: 32768 complex points  
 LB: 0.300 GF: 0.0000  
 Hz/cm: 114.599 ppm/cm: 0.28640

SpinWorks 3: 08252009-28-georgeM 13C Pt(ICy12)2Me2 (C6D6)

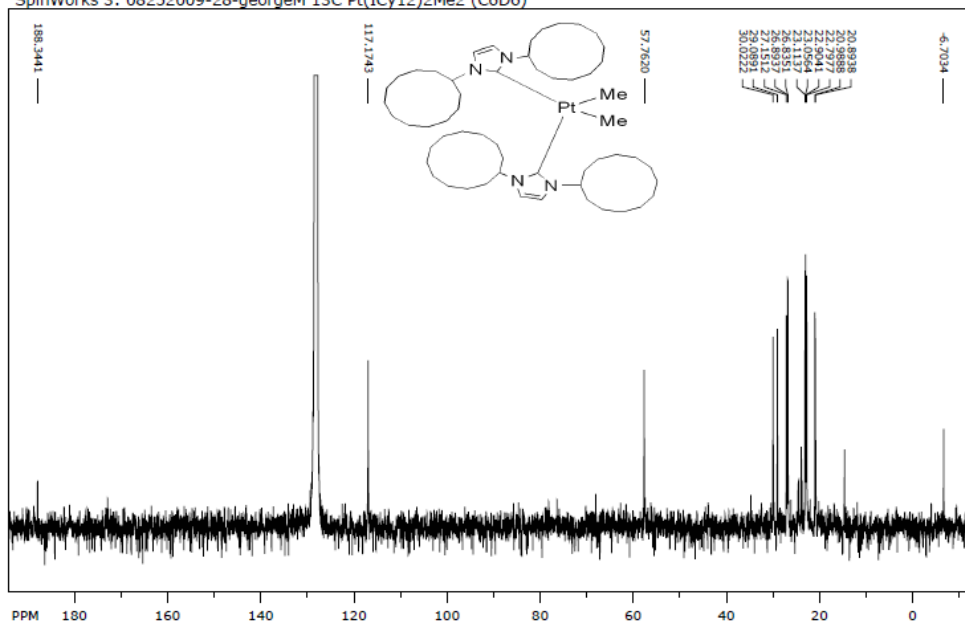

file: ...August\08252009-28-georgeM\11\fid exp: <zgpg30>  
 transmitter freq.: 100.622830 MHz  
 time domain size: 65536 points  
 width: 29761.90 Hz = 295.7769 ppm = 0.454131 Hz/pt  
 number of scans: 800

freq. of 0 ppm: 100.612707 MHz  
 processed size: 32768 complex points  
 LB: 2.000 GF: 0.0000  
 Hz/cm: 836.951 ppm/cm: 8.31771

### Ir(ICy<sup>7</sup>)(cod)Cl

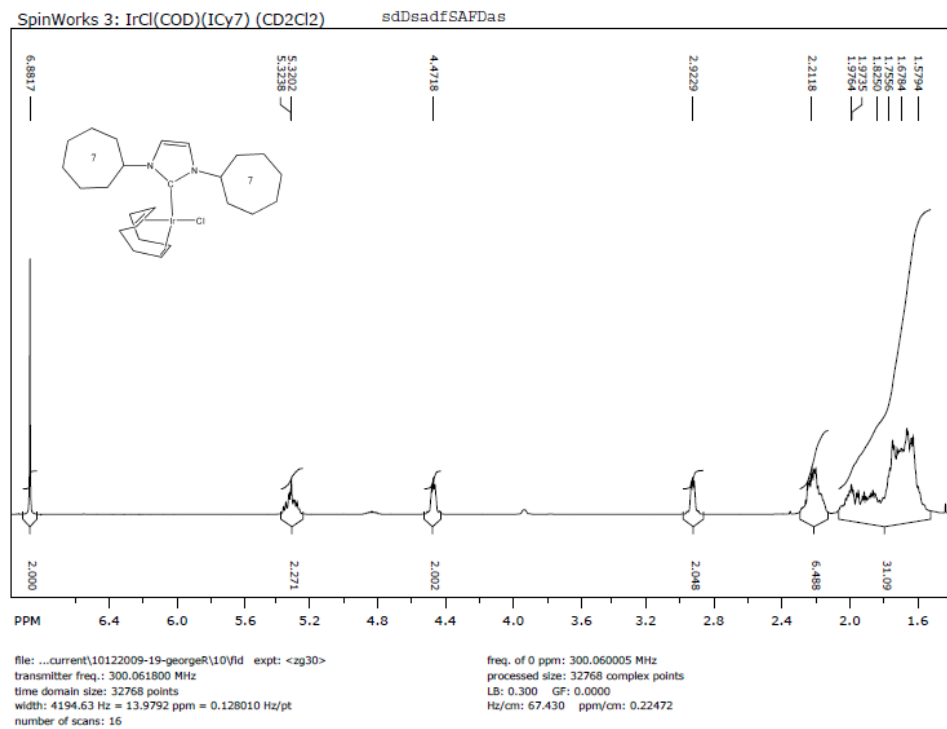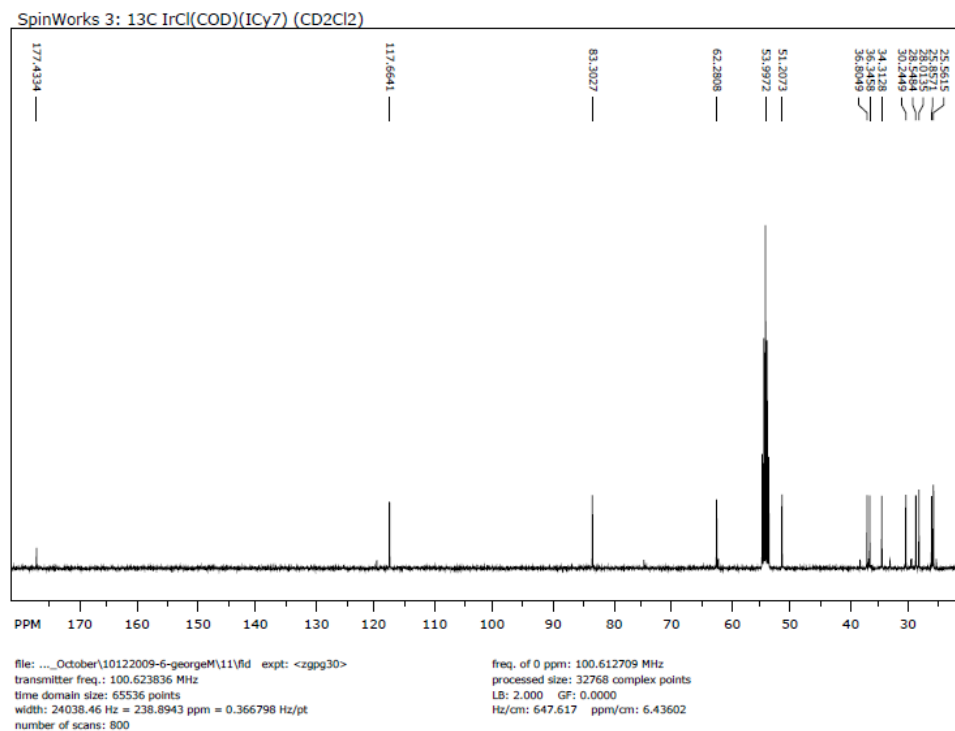

# Ir(ICy<sup>8</sup>)(cod)Cl

SpinWorks 3: Ir(Cl)(COD)(ICy8) (CD2Cl2)

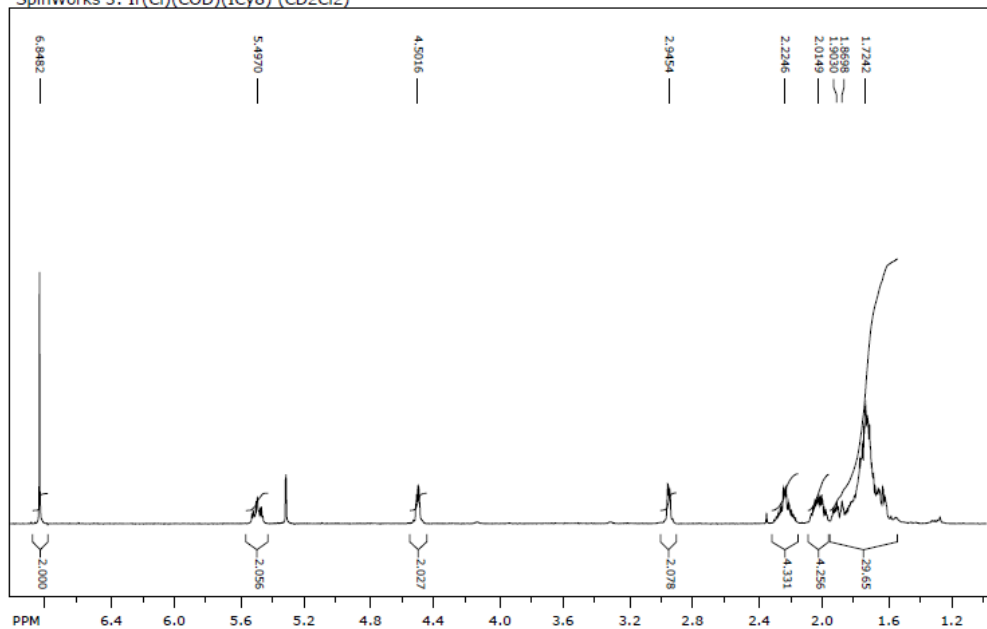

file: ...current\10142009-30-georgeM\10\fid exp: <zg30>  
transmitter freq.: 400.132401 MHz  
time domain size: 65536 points  
width: 5597.01 Hz = 13.9879 ppm = 0.085404 Hz/pt

freq. of 0 ppm: 400.130010 MHz  
processed size: 32768 complex points  
LB: 0.300 GF: 0.0000  
Hz/cm: 97.072 ppm/cm: 0.24260

SpinWorks 3: 13C IrCl(COD)(ICy8) (CD2Cl2)

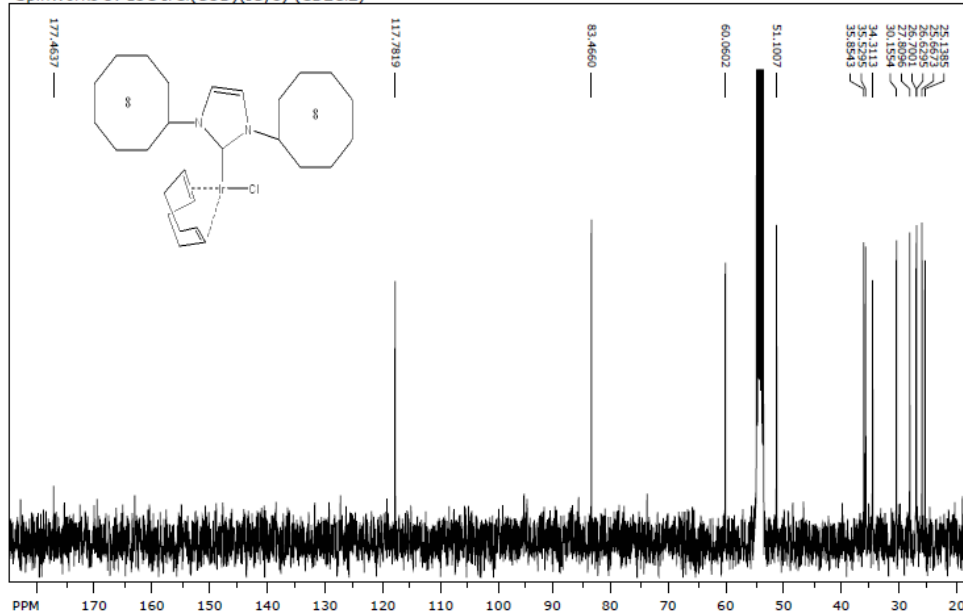

file: ...October\10142009-3-georgeM\11\fid exp: <zpg30>  
transmitter freq.: 100.623836 MHz  
time domain size: 65536 points  
width: 24038.46 Hz = 238.8943 ppm = 0.366798 Hz/pt  
number of scans: 800

freq. of 0 ppm: 100.612708 MHz  
processed size: 32768 complex points  
LB: 2.000 GF: 0.0000  
Hz/cm: 674.807 ppm/cm: 6.70624

### Ir(ICy<sup>12</sup>)(cod)Cl

SpinWorks 3: Ir(COD)Cl(ICy12) (CD2Cl2)

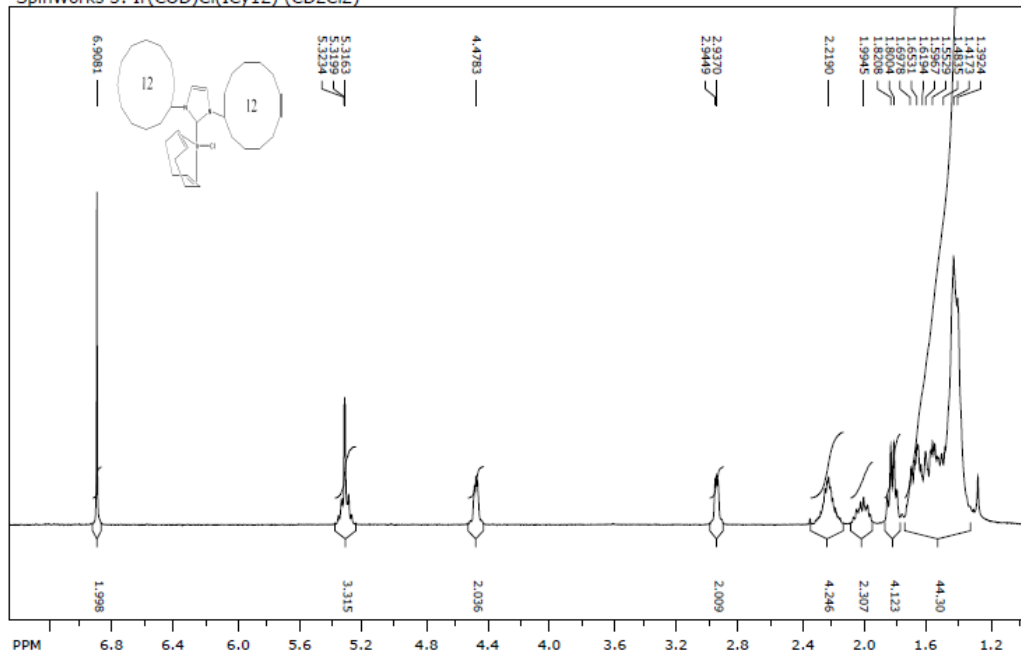

file: ...October\10102009-20-georgeR\10\fid exp: <zg30>  
transmitter freq.: 300.061800 MHz  
time domain size: 32768 points  
width: 4194.63 Hz = 13.9792 ppm = 0.128010 Hz/pt  
number of scans: 16

freq. of 0 ppm: 300.060007 MHz  
processed size: 32768 complex points  
LB: 0.300 GF: 0.0000  
Hz/cm: 78.357 ppm/cm: 0.26114

SpinWorks 3: Ir(COD)Cl(ICy12) (CD2Cl2)

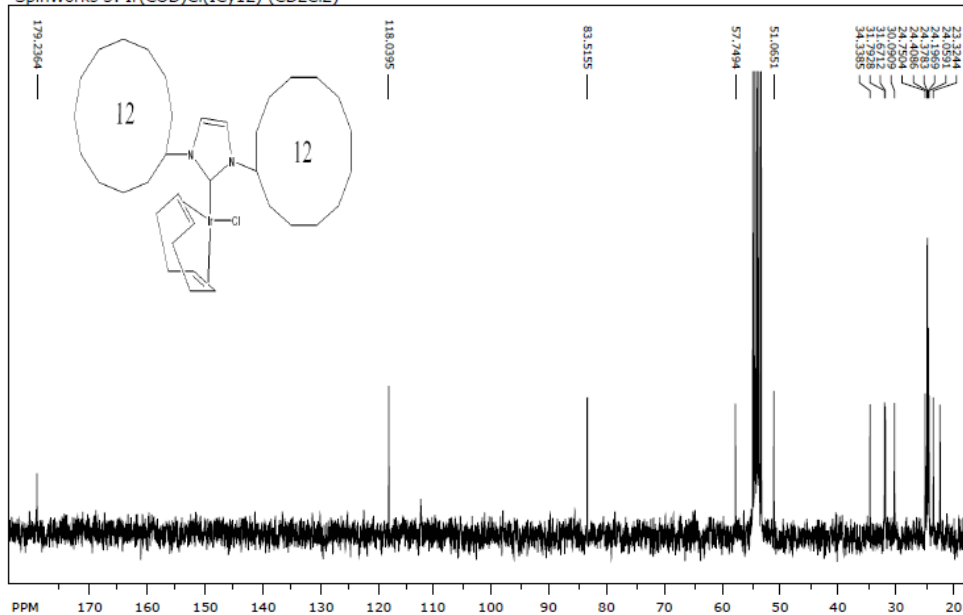

file: ...October\10102009-20-georgeR\11\fid exp: <zpg30>  
transmitter freq.: 75.458417 MHz  
time domain size: 65536 points  
width: 18115.94 Hz = 240.0785 ppm = 0.276427 Hz/pt  
number of scans: 800

freq. of 0 ppm: 75.450101 MHz  
processed size: 65536 complex points  
LB: 2.000 GF: 0.0000  
Hz/cm: 504.204 ppm/cm: 6.68188



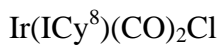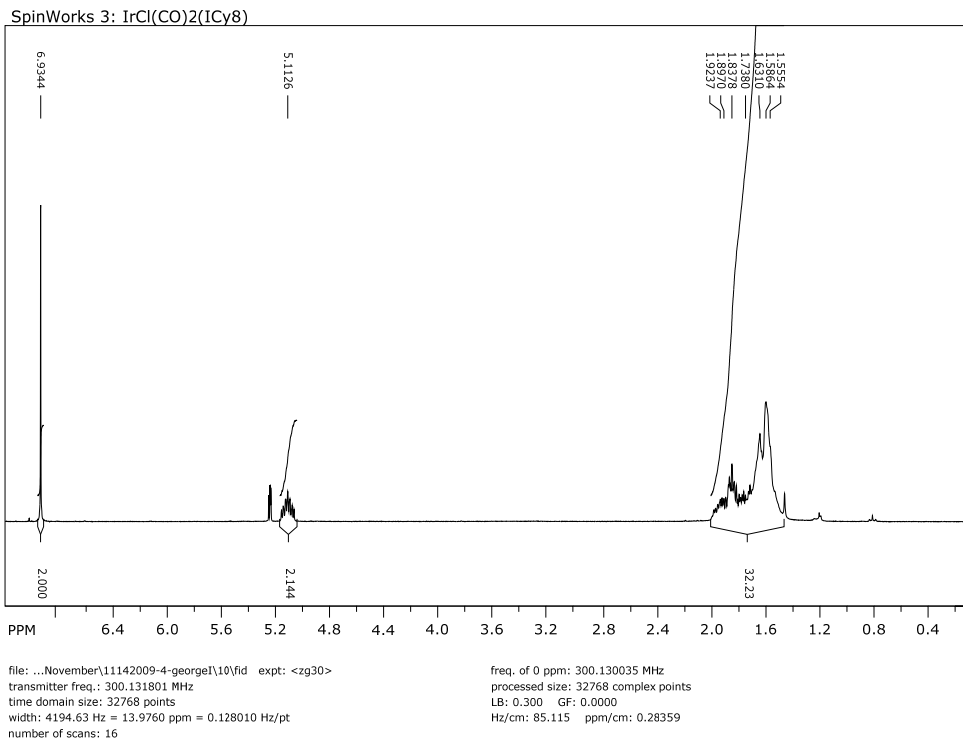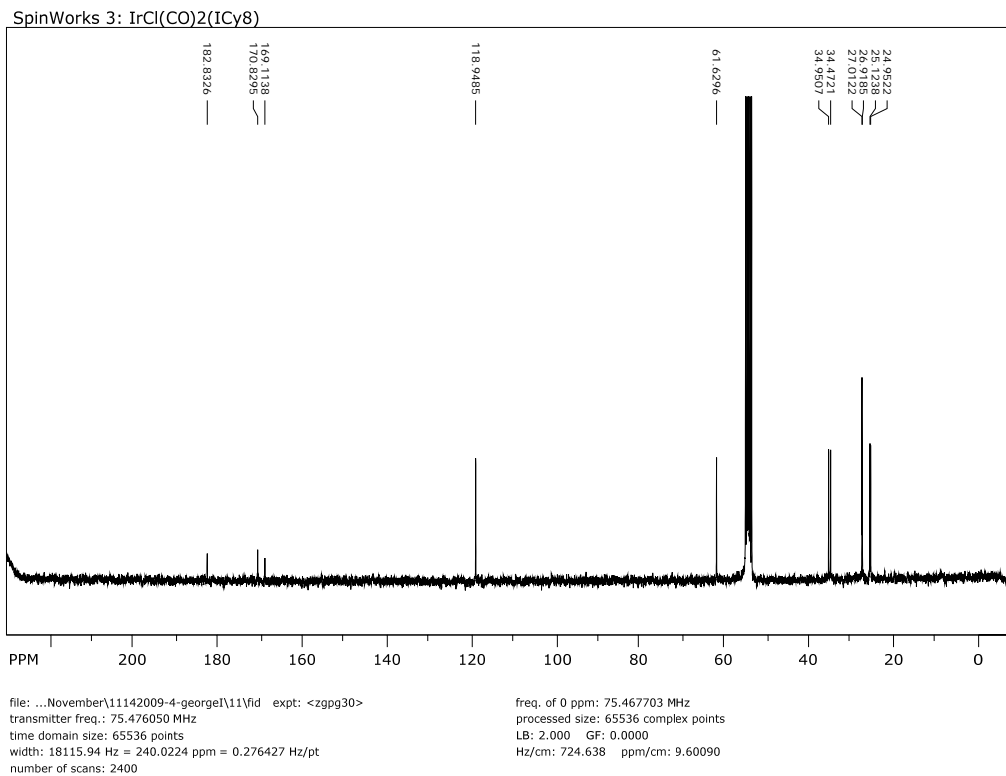

# Ir(ICy<sup>12</sup>)(CO)<sub>2</sub>Cl

SpinWorks 3: IrCl(CO)<sub>2</sub>(ICy12)

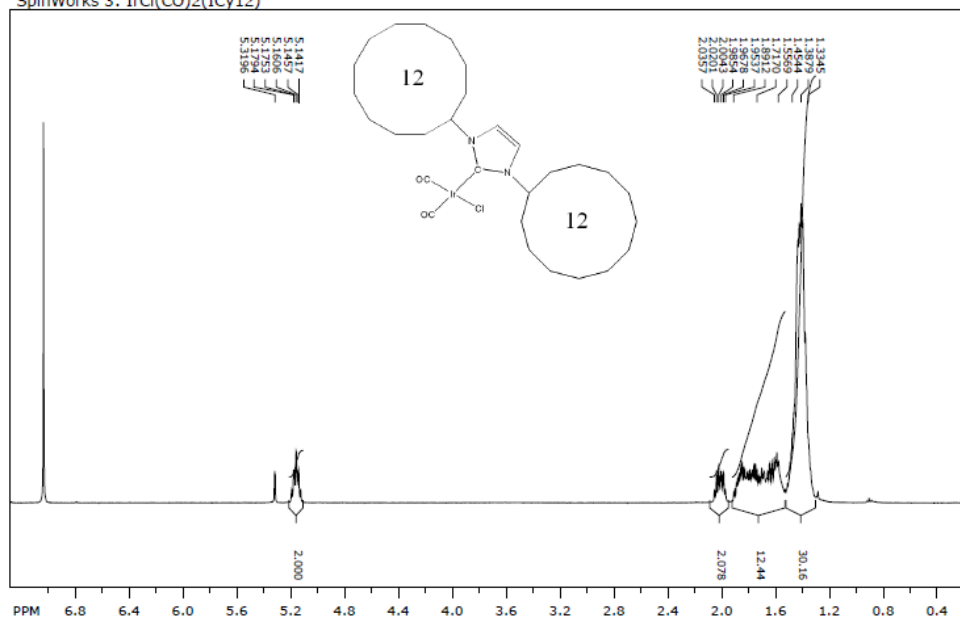

file: ...\_October\10132009-8-georgeM\10\fd expt: <zg30>  
transmitter freq.: 400.132401 MHz  
time domain size: 65536 points  
width: 5597.01 Hz = 13.9879 ppm = 0.085404 Hz/pt  
number of scans: 8

freq. of 0 ppm: 400.130010 MHz  
processed size: 32768 complex points  
LB: 0.300 GF: 0.0000  
Hz/cm: 114.530 ppm/cm: 0.28623

SpinWorks 3: <sup>13</sup>C IrCl(CO)<sub>2</sub>(ICy12)

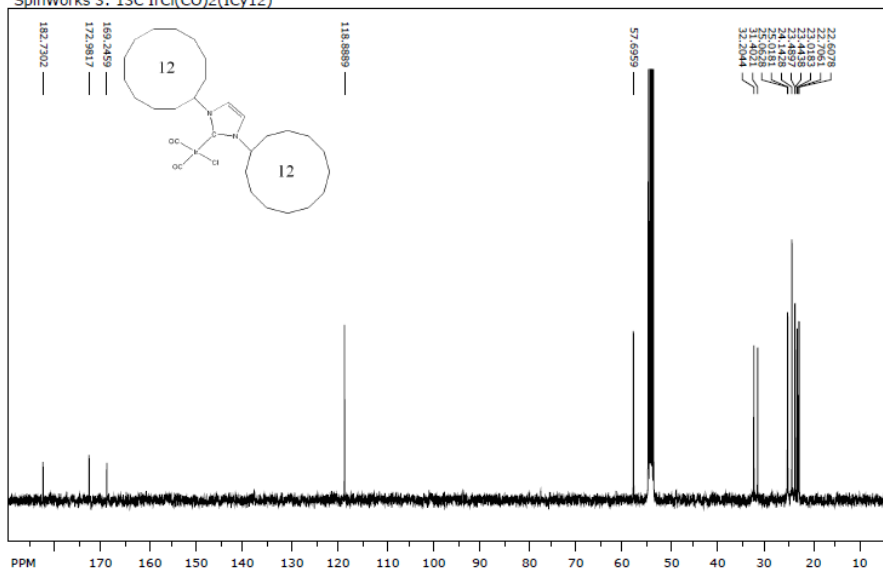

file: ...\_October\10132009-8-georgeM\11\fd expt: <zpg30>  
transmitter freq.: 100.623636 MHz  
time domain size: 65536 points  
width: 24038.46 Hz = 238.8943 ppm = 0.366798 Hz/pt  
number of scans: 800

freq. of 0 ppm: 100.612708 MHz  
processed size: 32768 complex points  
LB: 2.000 GF: 0.0000  
Hz/cm: 753.082 ppm/cm: 7.48413

## FTIR

*cis*-Ir(ICy<sup>8</sup>)(CO)<sub>2</sub>Cl

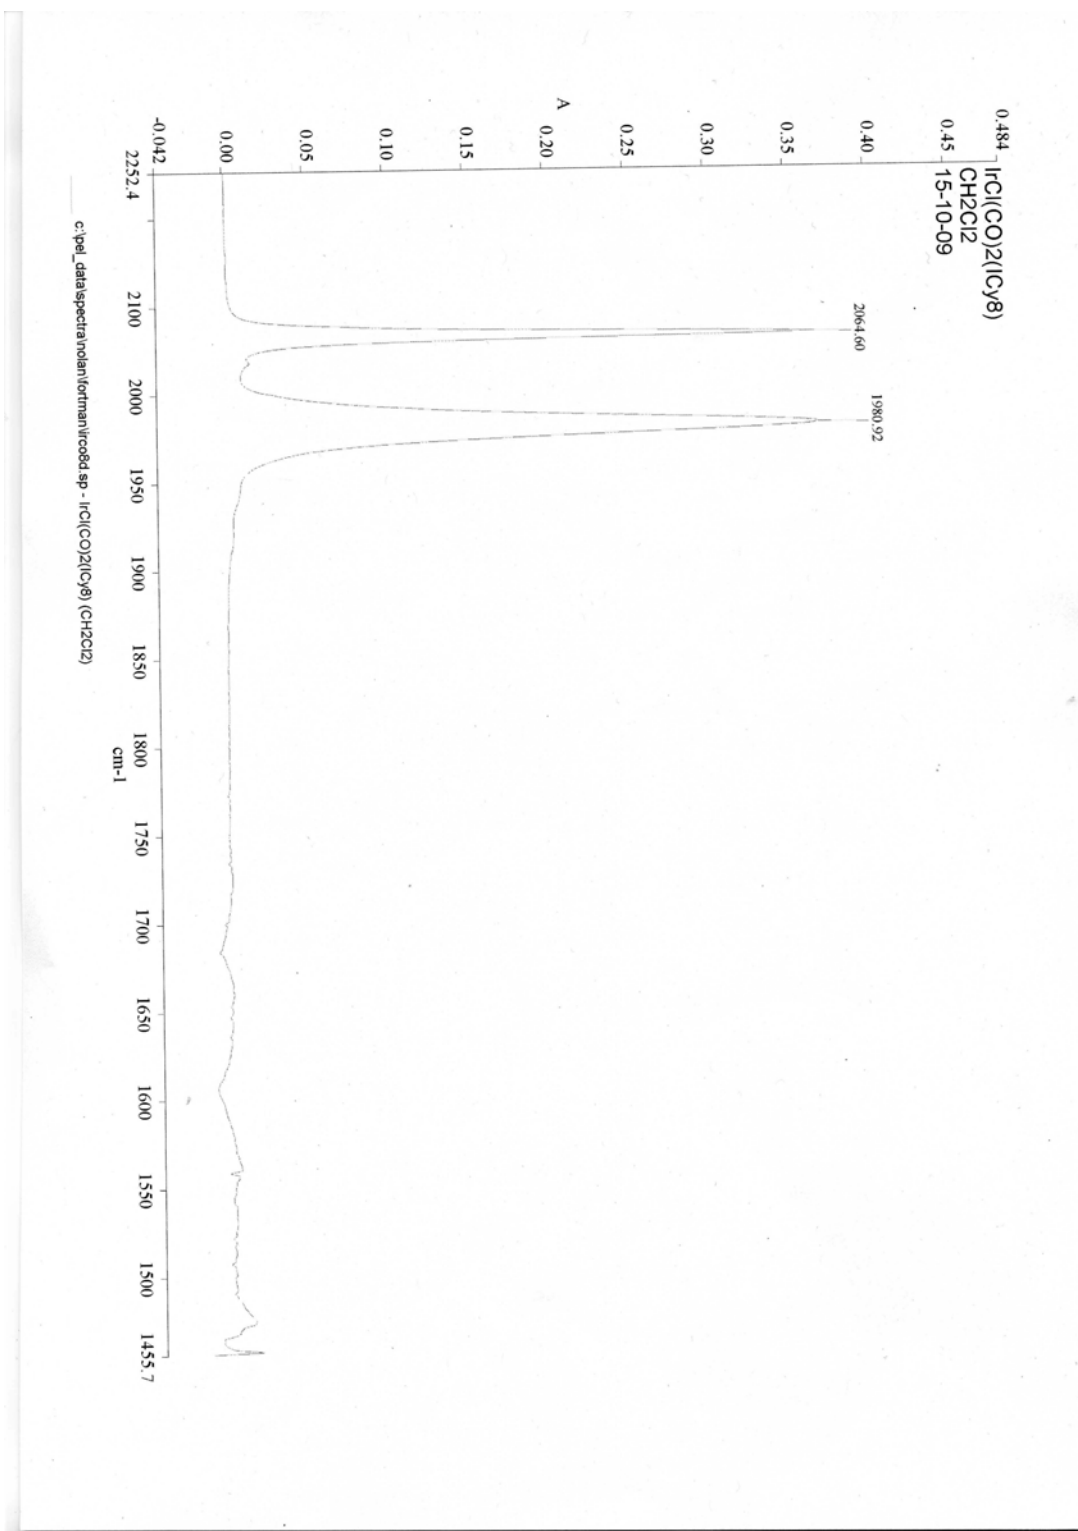

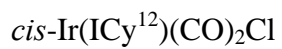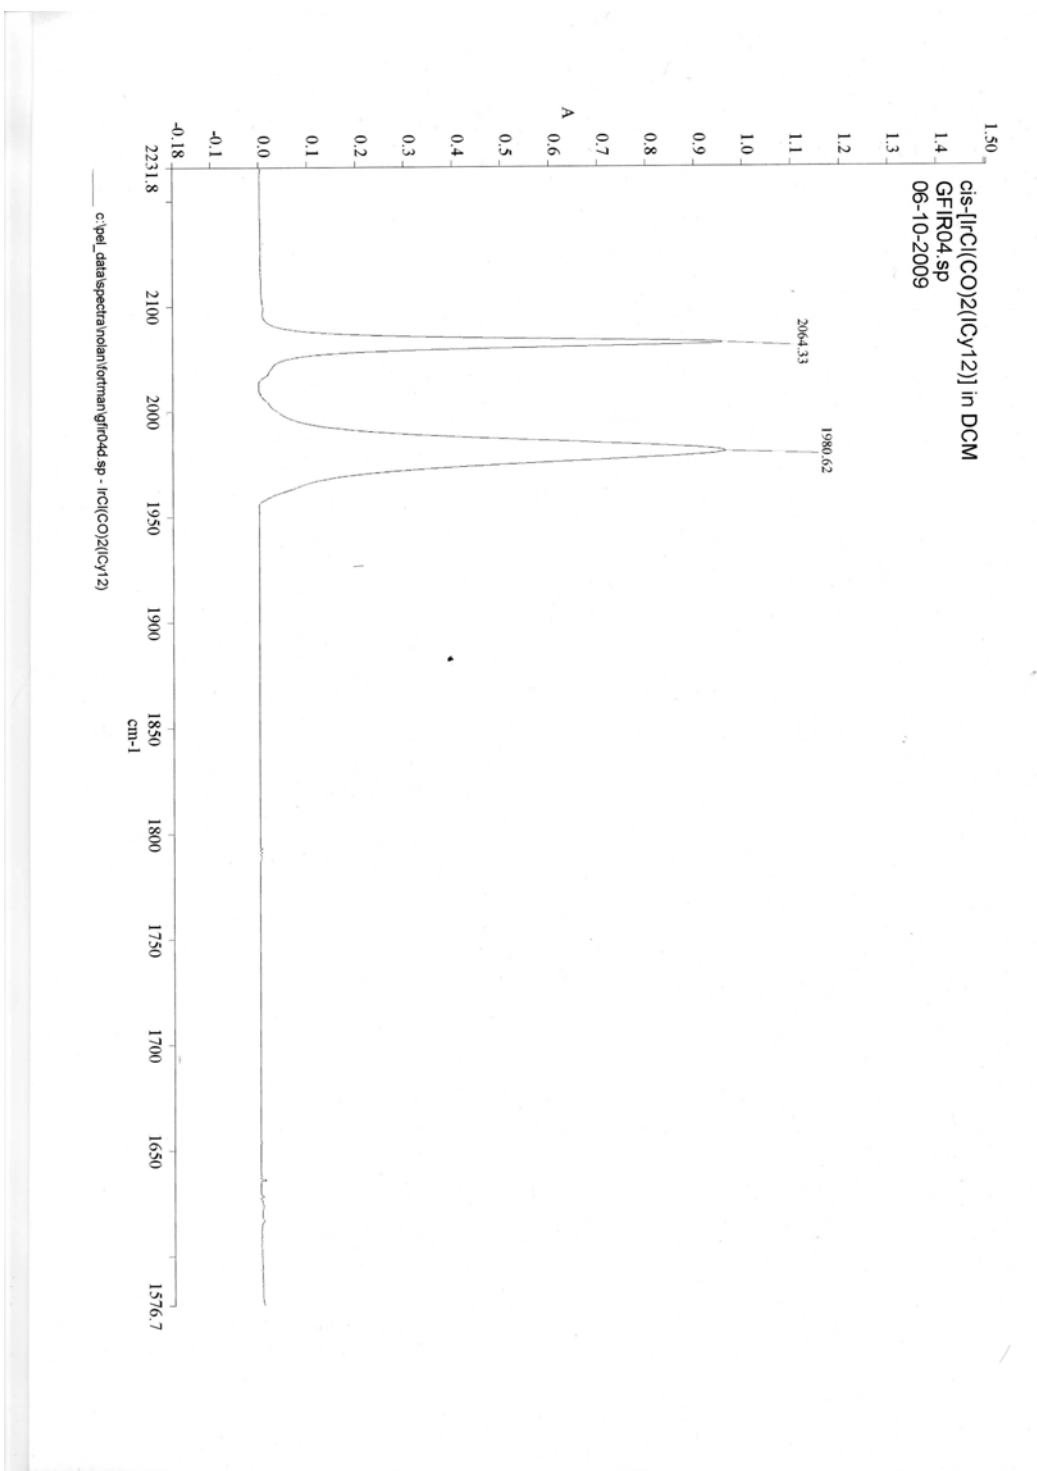



*cis*-Pt(ICy<sup>8</sup>)<sub>2</sub>Me<sub>2</sub>

SambVca@MOLNAC

**SambVca @ MolNAC**  
Results page

---

S A M B V C A  
Buzlak Volume in Italian  
http://www.molnac.unina.it/DF/Tools/SambVca  
S. Cavallo et al. email: scavallo@unina.it

---

**Molecule from input :**  
Molecule from input :  
./tmp/33136370Testand7747843a439.c3d

Number of atoms : 53  
Atom that is coordinated : 3  
Atom that define the axis : 3  
ID of these atoms : 1 32 53  
Radius of sphere (Angs) : 3.500  
Distance from sphere (Angs) : 2.000  
Mesh step (Angs) : 4  
H atoms included in the V\_Bur calculation

**Cartesian coordinates from input :**  
Cartesian coordinates from input  
Pt 1 20.40300 40.43000  
C 2 20.40300 38.49300  
C 3 20.40300 38.49300  
C 4 20.40300 38.49300

SambVca@MOLNAC

```

1 20.40300 40.43000 41.10000
2 20.40300 38.49300 41.10000
3 20.40300 38.49300 41.10000
4 20.40300 38.49300 41.10000
5 20.40300 38.49300 41.10000
6 20.40300 38.49300 41.10000
7 20.40300 38.49300 41.10000
8 20.40300 38.49300 41.10000
9 20.40300 38.49300 41.10000
10 20.40300 38.49300 41.10000
11 20.40300 38.49300 41.10000
12 20.40300 38.49300 41.10000
13 20.40300 38.49300 41.10000
14 20.40300 38.49300 41.10000
15 20.40300 38.49300 41.10000
16 20.40300 38.49300 41.10000
17 20.40300 38.49300 41.10000
18 20.40300 38.49300 41.10000
19 20.40300 38.49300 41.10000
20 20.40300 38.49300 41.10000
21 20.40300 38.49300 41.10000
22 20.40300 38.49300 41.10000
23 20.40300 38.49300 41.10000
24 20.40300 38.49300 41.10000
25 20.40300 38.49300 41.10000
26 20.40300 38.49300 41.10000
27 20.40300 38.49300 41.10000
28 20.40300 38.49300 41.10000
29 20.40300 38.49300 41.10000
30 20.40300 38.49300 41.10000
31 20.40300 38.49300 41.10000
32 20.40300 38.49300 41.10000
33 20.40300 38.49300 41.10000
34 20.40300 38.49300 41.10000
35 20.40300 38.49300 41.10000
36 20.40300 38.49300 41.10000
37 20.40300 38.49300 41.10000
38 20.40300 38.49300 41.10000
39 20.40300 38.49300 41.10000
40 20.40300 38.49300 41.10000
41 20.40300 38.49300 41.10000
42 20.40300 38.49300 41.10000
43 20.40300 38.49300 41.10000
44 20.40300 38.49300 41.10000
45 20.40300 38.49300 41.10000
46 20.40300 38.49300 41.10000
47 20.40300 38.49300 41.10000
48 20.40300 38.49300 41.10000
49 20.40300 38.49300 41.10000
50 20.40300 38.49300 41.10000
51 20.40300 38.49300 41.10000
52 20.40300 38.49300 41.10000
53 20.40300 38.49300 41.10000

```

SambVca@MOLNAC

```

1 20.40300 40.43000 41.10000
2 20.40300 38.49300 41.10000
3 20.40300 38.49300 41.10000
4 20.40300 38.49300 41.10000
5 20.40300 38.49300 41.10000
6 20.40300 38.49300 41.10000
7 20.40300 38.49300 41.10000
8 20.40300 38.49300 41.10000
9 20.40300 38.49300 41.10000
10 20.40300 38.49300 41.10000
11 20.40300 38.49300 41.10000
12 20.40300 38.49300 41.10000
13 20.40300 38.49300 41.10000
14 20.40300 38.49300 41.10000
15 20.40300 38.49300 41.10000
16 20.40300 38.49300 41.10000
17 20.40300 38.49300 41.10000
18 20.40300 38.49300 41.10000
19 20.40300 38.49300 41.10000
20 20.40300 38.49300 41.10000
21 20.40300 38.49300 41.10000
22 20.40300 38.49300 41.10000
23 20.40300 38.49300 41.10000
24 20.40300 38.49300 41.10000
25 20.40300 38.49300 41.10000
26 20.40300 38.49300 41.10000
27 20.40300 38.49300 41.10000
28 20.40300 38.49300 41.10000
29 20.40300 38.49300 41.10000
30 20.40300 38.49300 41.10000
31 20.40300 38.49300 41.10000
32 20.40300 38.49300 41.10000
33 20.40300 38.49300 41.10000
34 20.40300 38.49300 41.10000
35 20.40300 38.49300 41.10000
36 20.40300 38.49300 41.10000
37 20.40300 38.49300 41.10000
38 20.40300 38.49300 41.10000
39 20.40300 38.49300 41.10000
40 20.40300 38.49300 41.10000
41 20.40300 38.49300 41.10000
42 20.40300 38.49300 41.10000
43 20.40300 38.49300 41.10000
44 20.40300 38.49300 41.10000
45 20.40300 38.49300 41.10000
46 20.40300 38.49300 41.10000
47 20.40300 38.49300 41.10000
48 20.40300 38.49300 41.10000
49 20.40300 38.49300 41.10000
50 20.40300 38.49300 41.10000
51 20.40300 38.49300 41.10000
52 20.40300 38.49300 41.10000
53 20.40300 38.49300 41.10000

```

**Atoms and radius in the parameter file**

Atom and radius in the parameter file

1 3.500  
2 3.500  
3 3.500  
4 3.500  
5 3.500  
6 3.500  
7 3.500  
8 3.500  
9 3.500  
10 3.500  
11 3.500  
12 3.500  
13 3.500  
14 3.500  
15 3.500  
16 3.500  
17 3.500  
18 3.500  
19 3.500  
20 3.500  
21 3.500  
22 3.500  
23 3.500  
24 3.500  
25 3.500  
26 3.500  
27 3.500  
28 3.500  
29 3.500  
30 3.500  
31 3.500  
32 3.500  
33 3.500  
34 3.500  
35 3.500  
36 3.500  
37 3.500  
38 3.500  
39 3.500  
40 3.500  
41 3.500  
42 3.500  
43 3.500  
44 3.500  
45 3.500  
46 3.500  
47 3.500  
48 3.500  
49 3.500  
50 3.500  
51 3.500  
52 3.500  
53 3.500

**Coordinates exited to put the metal at the origin**

Coordinates exited to put the metal at the origin

file:///C:/Documents and Settings/George Fortman/Desktop/Nolan(NH)C3PMQ2 Cal vs VBur(Free) CFF/Bur/DCL.Nml[1/22/2010 12:32:30 PM]

file:///C:/Documents and Settings/George Fortman/Desktop/Nolan(NH)C3PMQ2 Cal vs VBur(Free) CFF/Bur/DCL.Nml[1/22/2010 12:32:30 PM]

file:///C:/Documents and Settings/George Fortman/Desktop/Nolan(NH)C3PMQ2 Cal vs VBur(Free) CFF/Bur/DCL.Nml[1/22/2010 12:32:30 PM]

SambVca@MOLNAC

```

1 20.40300 40.43000 41.10000
2 20.40300 38.49300 41.10000
3 20.40300 38.49300 41.10000
4 20.40300 38.49300 41.10000
5 20.40300 38.49300 41.10000
6 20.40300 38.49300 41.10000
7 20.40300 38.49300 41.10000
8 20.40300 38.49300 41.10000
9 20.40300 38.49300 41.10000
10 20.40300 38.49300 41.10000
11 20.40300 38.49300 41.10000
12 20.40300 38.49300 41.10000
13 20.40300 38.49300 41.10000
14 20.40300 38.49300 41.10000
15 20.40300 38.49300 41.10000
16 20.40300 38.49300 41.10000
17 20.40300 38.49300 41.10000
18 20.40300 38.49300 41.10000
19 20.40300 38.49300 41.10000
20 20.40300 38.49300 41.10000
21 20.40300 38.49300 41.10000
22 20.40300 38.49300 41.10000
23 20.40300 38.49300 41.10000
24 20.40300 38.49300 41.10000
25 20.40300 38.49300 41.10000
26 20.40300 38.49300 41.10000
27 20.40300 38.49300 41.10000
28 20.40300 38.49300 41.10000
29 20.40300 38.49300 41.10000
30 20.40300 38.49300 41.10000
31 20.40300 38.49300 41.10000
32 20.40300 38.49300 41.10000
33 20.40300 38.49300 41.10000
34 20.40300 38.49300 41.10000
35 20.40300 38.49300 41.10000
36 20.40300 38.49300 41.10000
37 20.40300 38.49300 41.10000
38 20.40300 38.49300 41.10000
39 20.40300 38.49300 41.10000
40 20.40300 38.49300 41.10000
41 20.40300 38.49300 41.10000
42 20.40300 38.49300 41.10000
43 20.40300 38.49300 41.10000
44 20.40300 38.49300 41.10000
45 20.40300 38.49300 41.10000
46 20.40300 38.49300 41.10000
47 20.40300 38.49300 41.10000
48 20.40300 38.49300 41.10000
49 20.40300 38.49300 41.10000
50 20.40300 38.49300 41.10000
51 20.40300 38.49300 41.10000
52 20.40300 38.49300 41.10000
53 20.40300 38.49300 41.10000

```

SambVca@MOLNAC

```

1 20.40300 40.43000 41.10000
2 20.40300 38.49300 41.10000
3 20.40300 38.49300 41.10000
4 20.40300 38.49300 41.10000
5 20.40300 38.49300 41.10000
6 20.40300 38.49300 41.10000
7 20.40300 38.49300 41.10000
8 20.40300 38.49300 41.10000
9 20.40300 38.49300 41.10000
10 20.40300 38.49300 41.10000
11 20.40300 38.49300 41.10000
12 20.40300 38.49300 41.10000
13 20.40300 38.49300 41.10000
14 20.40300 38.49300 41.10000
15 20.40300 38.49300 41.10000
16 20.40300 38.49300 41.10000
17 20.40300 38.49300 41.10000
18 20.40300 38.49300 41.10000
19 20.40300 38.49300 41.10000
20 20.40300 38.49300 41.10000
21 20.40300 38.49300 41.10000
22 20.40300 38.49300 41.10000
23 20.40300 38.49300 41.10000
24 20.40300 38.49300 41.10000
25 20.40300 38.49300 41.10000
26 20.40300 38.49300 41.10000
27 20.40300 38.49300 41.10000
28 20.40300 38.49300 41.10000
29 20.40300 38.49300 41.10000
30 20.40300 38.49300 41.10000
31 20.40300 38.49300 41.10000
32 20.40300 38.49300 41.10000
33 20.40300 38.49300 41.10000
34 20.40300 38.49300 41.10000
35 20.40300 38.49300 41.10000
36 20.40300 38.49300 41.10000
37 20.40300 38.49300 41.10000
38 20.40300 38.49300 41.10000
39 20.40300 38.49300 41.10000
40 20.40300 38.49300 41.10000
41 20.40300 38.49300 41.10000
42 20.40300 38.49300 41.10000
43 20.40300 38.49300 41.10000
44 20.40300 38.49300 41.10000
45 20.40300 38.49300 41.10000
46 20.40300 38.49300 41.10000
47 20.40300 38.49300 41.10000
48 20.40300 38.49300 41.10000
49 20.40300 38.49300 41.10000
50 20.40300 38.49300 41.10000
51 20.40300 38.49300 41.10000
52 20.40300 38.49300 41.10000
53 20.40300 38.49300 41.10000

```

**Results - Volume in Angs^3**

Results - Volume in Angs^3

N of atoms registered : 53  
Volume of model : 0.1159-05  
N of Free : 53  
N of Buried : 0  
N of Free : 53  
N of Buried : 0  
N of Free : 53  
N of Buried : 0

file:///C:/Documents and Settings/George Fortman/Desktop/Nolan(NH)C3PMQ2 Cal vs VBur(Free) CFF/Bur/DCL.Nml[1/22/2010 12:32:30 PM]

file:///C:/Documents and Settings/George Fortman/Desktop/Nolan(NH)C3PMQ2 Cal vs VBur(Free) CFF/Bur/DCL.Nml[1/22/2010 12:32:30 PM]

SambVca@MOLNAC

The V\_Bur of your molecule is: 28.5

file:///C:/Documents and Settings/George Fortman/Desktop/Nolan(NH)C3PMQ2 Cal vs VBur(Free) CFF/Bur/DCL.Nml[1/22/2010 12:32:30 PM]



# cis-Ir(ICy)(CO)<sub>2</sub>Cl

SambVca@MoLNaC

## SambVca @ MoLNaC Results page

```
-----  
S A M B V C A  
Buried Volume in Zaierno  
http://www.molnac.unina.it/09-tools/SambVca  
L. Cavallo et Al. email: l.cavallo@unina.it  
-----
```

### Molecule from input :

```
Molecule from input :  
./temp/09b7707f0d3d403509b0752f3d3c747c.c3d1  
  
Number of atoms      : 41  
Atom that is coordinated : 3  
Atoms that define the axis : 2  
ID of these atoms    : 40 41  
  
Radius of sphere (Angs) : 3.550  
Distance from sphere (Angs) : 2.050  
Mask atomp (Angs)      : 0.050  
H atoms included in the V_bur calculation
```

### Cartesian coordinates from input :

```
Cartesian coordinates from input :  
C  
3.52600 -2.11600 1.04600  
4.95800 -2.12100 1.08000  
2.44400 -2.20700 0.89000  
4.75300 -3.83700 6.98400  
7.52000 -3.11100 8.07900  
9.96300 -3.11100 8.07900  
9.41100 -3.73300 8.72900  
8.80700 -3.88800 5.61300  
1.71100 -3.52900 5.61300  
0.86600 -3.14800 4.71000  
-0.51600 -3.67900 6.32900  
-0.97500 -3.14800 7.70200  
-0.04500 -4.57400 8.57900  
1.37500 -4.39600 8.48000  
2.95500 -1.38400 1.07900  
5.44100 -1.39600 1.18600  
4.75300 -4.81300 1.06100  
7.44400 -2.38300 8.03400  
7.02800 -3.60900 8.89500  
9.42200 -3.23500 8.79000  
9.04200 -4.66200 8.25100  
10.51900 -3.11600 6.70200  
9.84900 -2.41100 6.41100  
9.21300 -3.73500 4.70500  
8.83200 -4.95400 3.70100  
6.62000 -3.39700 4.91400  
7.33100 -2.57600 5.44200  
1.80000 -4.88800 6.94900  
0.88200 -2.25200 6.49100  
1.13600 -3.17900 5.27100  
H  
-0.57600 -4.56600 5.93800
```

file:///C:/Documents and Settings/George Fortman/Desktop/Nolan/Ir NH2CO/Final/Vbur/ICy.htm[1/22/2010 12:13:54 PM]

SambVca@MoLNaC

```
W  
1.01821 1.47330 5.26031  
Wx  
0.00000 0.00000 0.00000
```

### Results : Volumes in Angs<sup>3</sup>

```
Results : Volumes in Angs3  
# of nuclei examined : 11(2011)  
Volume of void : 8.18(215)  
V-Free V-Buried V-Total V-Empty  
137.074 84.460 177.535 37.074  
V-Free V-Buried V-Total V-Empty  
11.039 10.741 21.780 0.298
```

The %V\_Bur of your molecule is: 28.9

SambVca@MoLNaC

```
H  
-1.14100 -3.10800 5.83000  
H  
-1.02500 -2.88800 8.05900  
H  
-1.46100 -2.12800 1.77100  
H  
-0.25100 -4.49900 9.52300  
H  
-0.21200 -5.03000 8.11800  
H  
1.96100 -4.73200 8.88900  
H  
1.86300 -2.44100 8.83600  
H  
5.31100 -3.28300 6.93600
```

### Atoms and radius in the parameter file

```
Atoms and radius in the parameter file  
H  
1.18  
C  
1.99  
O  
1.49  
N  
1.81  
S  
1.81  
F  
1.45  
Cl  
1.72  
Br  
1.10  
I  
2.11  
Ba  
2.45  
Cs  
2.05
```

### Coordinates scaled to put the metal at the origin

Coordinates scaled to put the metal at the origin

```
CO  
-0.78979 4.10220 0.37071  
CO  
0.81251 4.09230 0.40471  
-0.40379 2.81130 0.18471  
-0.45121 3.85130 0.38971  
3.05521 2.90710 1.08371  
4.96821 2.90710 1.08371  
4.51221 2.84530 1.05071  
-0.49779 2.89930 1.05071  
-0.49779 2.71130 0.44771  
-1.44479 2.72230 0.41479  
-4.80379 2.63330 0.34829  
-0.40379 2.67030 1.07571  
-4.35979 1.64430 1.96171  
-0.40379 1.22230 1.97171  
-1.23379 4.83430 6.41871  
1.16421 4.83230 0.51971  
H  
2.45821 1.49530 0.28571  
H  
3.74821 1.97930 1.54971  
H  
2.79321 2.46130 2.02971  
H  
4.07321 2.94330 2.50971  
H  
4.74721 1.55430 1.67971  
H  
4.24421 3.50530 0.60971  
H  
5.95421 3.80730 0.66429  
H  
4.96821 2.40230 1.76229  
H  
4.51721 1.04430 1.97429  
H  
4.98521 1.04430 1.97429  
H  
-0.49779 1.84230 1.03329  
H  
-0.49779 1.79030 1.04829  
H  
-1.44479 1.79630 1.04829  
H  
-1.16779 3.03330 1.40429  
H  
-4.80379 1.62430 1.97529  
H  
-0.40379 1.11030 1.04529  
H  
-0.40379 2.70030 1.02771  
H  
-4.35979 2.09030 1.05571  
H  
-4.40379 1.71930 2.07371  
H  
-4.41479 0.71230 1.84371  
H  
-2.33379 1.48830 2.21371  
H  
-0.42379 2.97130 2.02371  
H  
-1.18379 2.71130 0.45371
```

file:///C:/Documents and Settings/George Fortman/Desktop/Nolan/Ir NH2CO/Final/Vbur/ICy.htm[1/22/2010 12:13:54 PM]

file:///C:/Documents and Settings/George Fortman/Desktop/Nolan/Ir NH2CO/Final/Vbur/ICy.htm[1/22/2010 12:13:54 PM]



# *cis*-Ir(ICy<sup>8</sup>)(CO)<sub>2</sub>Cl

Sambiva@Phy.Nrc

### Sambiva @ MoI.NaC Results page

\*\*\*\*\*  
 Report Name: *cis*-Ir(ICy<sup>8</sup>)(CO)<sub>2</sub>Cl  
<http://www.molsoft.com/moI.naC/Results.html>  
 L. Caralis et al. moI.naC@molsoft.com

---

**Molecule from Input :**

Molecule from Input :  
 ..femp00970379@016a44689376@hbk1.c3M

Number of atoms : 53  
 Name that defines the unit :  
 ID of these atoms : 52 53  
 Radius of sphere (Angst) : 3.300  
 Distance from sphere (Angst) : 0.100  
 Work step (Angst) :  
 # atoms included in the V<sub>surf</sub> : 48/52/53

---

**Cartesian coordinates from Input :**

```

    Cartesian coordinates from Input :
    1  0.0000  0.0000  0.0000
    2  1.0000  0.0000  0.0000
    3  0.0000  1.0000  0.0000
    4  0.0000  0.0000  1.0000
    5  0.0000  0.0000  0.0000
    
```

Sambiva@Phy.Nrc

```

    6  0.0000  0.0000  0.0000
    7  0.0000  0.0000  0.0000
    8  0.0000  0.0000  0.0000
    9  0.0000  0.0000  0.0000
    10  0.0000  0.0000  0.0000
    11  0.0000  0.0000  0.0000
    12  0.0000  0.0000  0.0000
    13  0.0000  0.0000  0.0000
    14  0.0000  0.0000  0.0000
    15  0.0000  0.0000  0.0000
    16  0.0000  0.0000  0.0000
    17  0.0000  0.0000  0.0000
    18  0.0000  0.0000  0.0000
    19  0.0000  0.0000  0.0000
    20  0.0000  0.0000  0.0000
    21  0.0000  0.0000  0.0000
    22  0.0000  0.0000  0.0000
    23  0.0000  0.0000  0.0000
    24  0.0000  0.0000  0.0000
    25  0.0000  0.0000  0.0000
    26  0.0000  0.0000  0.0000
    27  0.0000  0.0000  0.0000
    28  0.0000  0.0000  0.0000
    29  0.0000  0.0000  0.0000
    30  0.0000  0.0000  0.0000
    31  0.0000  0.0000  0.0000
    32  0.0000  0.0000  0.0000
    33  0.0000  0.0000  0.0000
    34  0.0000  0.0000  0.0000
    35  0.0000  0.0000  0.0000
    36  0.0000  0.0000  0.0000
    37  0.0000  0.0000  0.0000
    38  0.0000  0.0000  0.0000
    39  0.0000  0.0000  0.0000
    40  0.0000  0.0000  0.0000
    41  0.0000  0.0000  0.0000
    42  0.0000  0.0000  0.0000
    43  0.0000  0.0000  0.0000
    44  0.0000  0.0000  0.0000
    45  0.0000  0.0000  0.0000
    46  0.0000  0.0000  0.0000
    47  0.0000  0.0000  0.0000
    48  0.0000  0.0000  0.0000
    49  0.0000  0.0000  0.0000
    50  0.0000  0.0000  0.0000
    51  0.0000  0.0000  0.0000
    52  0.0000  0.0000  0.0000
    53  0.0000  0.0000  0.0000
    
```

Sambiva@Phy.Nrc

| Atom | X      | Y      | Z      |
|------|--------|--------|--------|
| 1    | 0.0000 | 0.0000 | 0.0000 |
| 2    | 1.0000 | 0.0000 | 0.0000 |
| 3    | 0.0000 | 1.0000 | 0.0000 |
| 4    | 0.0000 | 0.0000 | 1.0000 |
| 5    | 0.0000 | 0.0000 | 0.0000 |
| 6    | 0.0000 | 0.0000 | 0.0000 |
| 7    | 0.0000 | 0.0000 | 0.0000 |
| 8    | 0.0000 | 0.0000 | 0.0000 |
| 9    | 0.0000 | 0.0000 | 0.0000 |
| 10   | 0.0000 | 0.0000 | 0.0000 |
| 11   | 0.0000 | 0.0000 | 0.0000 |
| 12   | 0.0000 | 0.0000 | 0.0000 |
| 13   | 0.0000 | 0.0000 | 0.0000 |
| 14   | 0.0000 | 0.0000 | 0.0000 |
| 15   | 0.0000 | 0.0000 | 0.0000 |
| 16   | 0.0000 | 0.0000 | 0.0000 |
| 17   | 0.0000 | 0.0000 | 0.0000 |
| 18   | 0.0000 | 0.0000 | 0.0000 |
| 19   | 0.0000 | 0.0000 | 0.0000 |
| 20   | 0.0000 | 0.0000 | 0.0000 |
| 21   | 0.0000 | 0.0000 | 0.0000 |
| 22   | 0.0000 | 0.0000 | 0.0000 |
| 23   | 0.0000 | 0.0000 | 0.0000 |
| 24   | 0.0000 | 0.0000 | 0.0000 |
| 25   | 0.0000 | 0.0000 | 0.0000 |
| 26   | 0.0000 | 0.0000 | 0.0000 |
| 27   | 0.0000 | 0.0000 | 0.0000 |
| 28   | 0.0000 | 0.0000 | 0.0000 |
| 29   | 0.0000 | 0.0000 | 0.0000 |
| 30   | 0.0000 | 0.0000 | 0.0000 |
| 31   | 0.0000 | 0.0000 | 0.0000 |
| 32   | 0.0000 | 0.0000 | 0.0000 |
| 33   | 0.0000 | 0.0000 | 0.0000 |
| 34   | 0.0000 | 0.0000 | 0.0000 |
| 35   | 0.0000 | 0.0000 | 0.0000 |
| 36   | 0.0000 | 0.0000 | 0.0000 |
| 37   | 0.0000 | 0.0000 | 0.0000 |
| 38   | 0.0000 | 0.0000 | 0.0000 |
| 39   | 0.0000 | 0.0000 | 0.0000 |
| 40   | 0.0000 | 0.0000 | 0.0000 |
| 41   | 0.0000 | 0.0000 | 0.0000 |
| 42   | 0.0000 | 0.0000 | 0.0000 |
| 43   | 0.0000 | 0.0000 | 0.0000 |
| 44   | 0.0000 | 0.0000 | 0.0000 |
| 45   | 0.0000 | 0.0000 | 0.0000 |
| 46   | 0.0000 | 0.0000 | 0.0000 |
| 47   | 0.0000 | 0.0000 | 0.0000 |
| 48   | 0.0000 | 0.0000 | 0.0000 |
| 49   | 0.0000 | 0.0000 | 0.0000 |
| 50   | 0.0000 | 0.0000 | 0.0000 |
| 51   | 0.0000 | 0.0000 | 0.0000 |
| 52   | 0.0000 | 0.0000 | 0.0000 |
| 53   | 0.0000 | 0.0000 | 0.0000 |

Atoms and radius in the parameter file

```

    Atom and radius in the parameter file
    1  Ir  0.0000
    2  Cl  0.0000
    3  C  0.0000
    4  N  0.0000
    5  O  0.0000
    6  S  0.0000
    7  P  0.0000
    8  D  0.0000
    9  H  0.0000
    10  F  0.0000
    11  Br  0.0000
    12  I  0.0000
    
```

Coordinates scaled to put the metal at the origin

File: [C:\Documents and Settings\George Fortman\Desktop\files\H\CCDC\Final\Nrc\08-9-sambiva\_result.php.html\0202010 12:12:47 PM] Sambiva@Phy.Nrc

```

    1  0.0000  0.0000  0.0000
    2  1.0000  0.0000  0.0000
    3  0.0000  1.0000  0.0000
    4  0.0000  0.0000  1.0000
    5  0.0000  0.0000  0.0000
    6  0.0000  0.0000  0.0000
    7  0.0000  0.0000  0.0000
    8  0.0000  0.0000  0.0000
    9  0.0000  0.0000  0.0000
    10  0.0000  0.0000  0.0000
    11  0.0000  0.0000  0.0000
    12  0.0000  0.0000  0.0000
    13  0.0000  0.0000  0.0000
    14  0.0000  0.0000  0.0000
    15  0.0000  0.0000  0.0000
    16  0.0000  0.0000  0.0000
    17  0.0000  0.0000  0.0000
    18  0.0000  0.0000  0.0000
    19  0.0000  0.0000  0.0000
    20  0.0000  0.0000  0.0000
    21  0.0000  0.0000  0.0000
    22  0.0000  0.0000  0.0000
    23  0.0000  0.0000  0.0000
    24  0.0000  0.0000  0.0000
    25  0.0000  0.0000  0.0000
    26  0.0000  0.0000  0.0000
    27  0.0000  0.0000  0.0000
    28  0.0000  0.0000  0.0000
    29  0.0000  0.0000  0.0000
    30  0.0000  0.0000  0.0000
    31  0.0000  0.0000  0.0000
    32  0.0000  0.0000  0.0000
    33  0.0000  0.0000  0.0000
    34  0.0000  0.0000  0.0000
    35  0.0000  0.0000  0.0000
    36  0.0000  0.0000  0.0000
    37  0.0000  0.0000  0.0000
    38  0.0000  0.0000  0.0000
    39  0.0000  0.0000  0.0000
    40  0.0000  0.0000  0.0000
    41  0.0000  0.0000  0.0000
    42  0.0000  0.0000  0.0000
    43  0.0000  0.0000  0.0000
    44  0.0000  0.0000  0.0000
    45  0.0000  0.0000  0.0000
    46  0.0000  0.0000  0.0000
    47  0.0000  0.0000  0.0000
    48  0.0000  0.0000  0.0000
    49  0.0000  0.0000  0.0000
    50  0.0000  0.0000  0.0000
    51  0.0000  0.0000  0.0000
    52  0.0000  0.0000  0.0000
    53  0.0000  0.0000  0.0000
    
```

Sambiva@Phy.Nrc

```

    1  0.0000  0.0000  0.0000
    2  1.0000  0.0000  0.0000
    3  0.0000  1.0000  0.0000
    4  0.0000  0.0000  1.0000
    5  0.0000  0.0000  0.0000
    6  0.0000  0.0000  0.0000
    7  0.0000  0.0000  0.0000
    8  0.0000  0.0000  0.0000
    9  0.0000  0.0000  0.0000
    10  0.0000  0.0000  0.0000
    11  0.0000  0.0000  0.0000
    12  0.0000  0.0000  0.0000
    13  0.0000  0.0000  0.0000
    14  0.0000  0.0000  0.0000
    15  0.0000  0.0000  0.0000
    16  0.0000  0.0000  0.0000
    17  0.0000  0.0000  0.0000
    18  0.0000  0.0000  0.0000
    19  0.0000  0.0000  0.0000
    20  0.0000  0.0000  0.0000
    21  0.0000  0.0000  0.0000
    22  0.0000  0.0000  0.0000
    23  0.0000  0.0000  0.0000
    24  0.0000  0.0000  0.0000
    25  0.0000  0.0000  0.0000
    26  0.0000  0.0000  0.0000
    27  0.0000  0.0000  0.0000
    28  0.0000  0.0000  0.0000
    29  0.0000  0.0000  0.0000
    30  0.0000  0.0000  0.0000
    31  0.0000  0.0000  0.0000
    32  0.0000  0.0000  0.0000
    33  0.0000  0.0000  0.0000
    34  0.0000  0.0000  0.0000
    35  0.0000  0.0000  0.0000
    36  0.0000  0.0000  0.0000
    37  0.0000  0.0000  0.0000
    38  0.0000  0.0000  0.0000
    39  0.0000  0.0000  0.0000
    40  0.0000  0.0000  0.0000
    41  0.0000  0.0000  0.0000
    42  0.0000  0.0000  0.0000
    43  0.0000  0.0000  0.0000
    44  0.0000  0.0000  0.0000
    45  0.0000  0.0000  0.0000
    46  0.0000  0.0000  0.0000
    47  0.0000  0.0000  0.0000
    48  0.0000  0.0000  0.0000
    49  0.0000  0.0000  0.0000
    50  0.0000  0.0000  0.0000
    51  0.0000  0.0000  0.0000
    52  0.0000  0.0000  0.0000
    53  0.0000  0.0000  0.0000
    
```

Sambiva@Phy.Nrc

```

    1  0.0000  0.0000  0.0000
    2  1.0000  0.0000  0.0000
    3  0.0000  1.0000  0.0000
    4  0.0000  0.0000  1.0000
    5  0.0000  0.0000  0.0000
    6  0.0000  0.0000  0.0000
    7  0.0000  0.0000  0.0000
    8  0.0000  0.0000  0.0000
    9  0.0000  0.0000  0.0000
    10  0.0000  0.0000  0.0000
    11  0.0000  0.0000  0.0000
    12  0.0000  0.0000  0.0000
    13  0.0000  0.0000  0.0000
    14  0.0000  0.0000  0.0000
    15  0.0000  0.0000  0.0000
    16  0.0000  0.0000  0.0000
    17  0.0000  0.0000  0.0000
    18  0.0000  0.0000  0.0000
    19  0.0000  0.0000  0.0000
    20  0.0000  0.0000  0.0000
    21  0.0000  0.0000  0.0000
    22  0.0000  0.0000  0.0000
    23  0.0000  0.0000  0.0000
    24  0.0000  0.0000  0.0000
    25  0.0000  0.0000  0.0000
    26  0.0000  0.0000  0.0000
    27  0.0000  0.0000  0.0000
    28  0.0000  0.0000  0.0000
    29  0.0000  0.0000  0.0000
    30  0.0000  0.0000  0.0000
    31  0.0000  0.0000  0.0000
    32  0.0000  0.0000  0.0000
    33  0.0000  0.0000  0.0000
    34  0.0000  0.0000  0.0000
    35  0.0000  0.0000  0.0000
    36  0.0000  0.0000  0.0000
    37  0.0000  0.0000  0.0000
    38  0.0000  0.0000  0.0000
    39  0.0000  0.0000  0.0000
    40  0.0000  0.0000  0.0000
    41  0.0000  0.0000  0.0000
    42  0.0000  0.0000  0.0000
    43  0.0000  0.0000  0.0000
    44  0.0000  0.0000  0.0000
    45  0.0000  0.0000  0.0000
    46  0.0000  0.0000  0.0000
    47  0.0000  0.0000  0.0000
    48  0.0000  0.0000  0.0000
    49  0.0000  0.0000  0.0000
    50  0.0000  0.0000  0.0000
    51  0.0000  0.0000  0.0000
    52  0.0000  0.0000  0.0000
    53  0.0000  0.0000  0.0000
    
```

Sambiva@Phy.Nrc

The V<sub>surf</sub> of your molecule is: 30.7

File: [C:\Documents and Settings\George Fortman\Desktop\files\H\CCDC\Final\Nrc\08-9-sambiva\_result.php.html\0202010 12:12:47 PM] Sambiva@Phy.Nrc

### *cis*-Ir(ICy<sup>12</sup>)(CO)<sub>2</sub>Cl

SambVca@Phd.tusc

### SambVca @ MolNaC Results page

---

**S A M B V C A**  
Buried Volume Calculator  
<http://www.uclouvain.be/~s11/09-1003/3ambVca>  
L. Cavalari et al. email: [inveval@uclouvain.be](mailto:inveval@uclouvain.be)

---

**Molecule from input :**  
Molecule from input :  
../tmp/9C5372437948L1Caas0a00977a6h3c1\_001

Number of atoms : 77  
Atom type : 14  
Atom that define the unit :  
ID of these atoms : 76 77

Radius of sphere (Angst) : 3.200  
Extension from sphere (Angst) : 2.000  
Mean atmp (Angst) : 3.000  
# atoms included in the V<sub>Bur</sub> calculation :

---

**Cartesian coordinates from input :**  
Cartesian coordinates from input :  
C1 0.244000 +1.493000  
C2 0.207000  
C3 -0.810100 -2.341000  
C4 -0.114300 +2.394000

SambVca@Phd.tusc

```
C1 0.244000 +1.493000
C2 0.207000 +1.493000
C3 -0.810100 -2.341000
C4 -0.114300 +2.394000
C5 0.244000 +1.493000
C6 0.207000 +1.493000
C7 -0.810100 -2.341000
C8 -0.114300 +2.394000
C9 0.244000 +1.493000
C10 0.207000 +1.493000
C11 -0.810100 -2.341000
C12 -0.114300 +2.394000
C13 0.244000 +1.493000
C14 0.207000 +1.493000
C15 -0.810100 -2.341000
C16 -0.114300 +2.394000
C17 0.244000 +1.493000
C18 0.207000 +1.493000
C19 -0.810100 -2.341000
C20 -0.114300 +2.394000
C21 0.244000 +1.493000
C22 0.207000 +1.493000
C23 -0.810100 -2.341000
C24 -0.114300 +2.394000
C25 0.244000 +1.493000
C26 0.207000 +1.493000
C27 -0.810100 -2.341000
C28 -0.114300 +2.394000
C29 0.244000 +1.493000
C30 0.207000 +1.493000
C31 -0.810100 -2.341000
C32 -0.114300 +2.394000
C33 0.244000 +1.493000
C34 0.207000 +1.493000
C35 -0.810100 -2.341000
C36 -0.114300 +2.394000
C37 0.244000 +1.493000
C38 0.207000 +1.493000
C39 -0.810100 -2.341000
C40 -0.114300 +2.394000
C41 0.244000 +1.493000
C42 0.207000 +1.493000
C43 -0.810100 -2.341000
C44 -0.114300 +2.394000
C45 0.244000 +1.493000
C46 0.207000 +1.493000
C47 -0.810100 -2.341000
C48 -0.114300 +2.394000
C49 0.244000 +1.493000
C50 0.207000 +1.493000
C51 -0.810100 -2.341000
C52 -0.114300 +2.394000
C53 0.244000 +1.493000
C54 0.207000 +1.493000
C55 -0.810100 -2.341000
C56 -0.114300 +2.394000
C57 0.244000 +1.493000
C58 0.207000 +1.493000
C59 -0.810100 -2.341000
C60 -0.114300 +2.394000
C61 0.244000 +1.493000
C62 0.207000 +1.493000
C63 -0.810100 -2.341000
C64 -0.114300 +2.394000
C65 0.244000 +1.493000
C66 0.207000 +1.493000
C67 -0.810100 -2.341000
C68 -0.114300 +2.394000
C69 0.244000 +1.493000
C70 0.207000 +1.493000
C71 -0.810100 -2.341000
C72 -0.114300 +2.394000
C73 0.244000 +1.493000
C74 0.207000 +1.493000
C75 -0.810100 -2.341000
C76 -0.114300 +2.394000
C77 0.244000 +1.493000
```

SambVca@Phd.tusc

```
O1 0.244000 +1.493000
O2 0.207000 +1.493000
O3 -0.810100 -2.341000
O4 -0.114300 +2.394000
O5 0.244000 +1.493000
O6 0.207000 +1.493000
O7 -0.810100 -2.341000
O8 -0.114300 +2.394000
O9 0.244000 +1.493000
O10 0.207000 +1.493000
O11 -0.810100 -2.341000
O12 -0.114300 +2.394000
O13 0.244000 +1.493000
O14 0.207000 +1.493000
O15 -0.810100 -2.341000
O16 -0.114300 +2.394000
O17 0.244000 +1.493000
O18 0.207000 +1.493000
O19 -0.810100 -2.341000
O20 -0.114300 +2.394000
O21 0.244000 +1.493000
O22 0.207000 +1.493000
O23 -0.810100 -2.341000
O24 -0.114300 +2.394000
O25 0.244000 +1.493000
O26 0.207000 +1.493000
O27 -0.810100 -2.341000
O28 -0.114300 +2.394000
O29 0.244000 +1.493000
O30 0.207000 +1.493000
O31 -0.810100 -2.341000
O32 -0.114300 +2.394000
O33 0.244000 +1.493000
O34 0.207000 +1.493000
O35 -0.810100 -2.341000
O36 -0.114300 +2.394000
O37 0.244000 +1.493000
O38 0.207000 +1.493000
O39 -0.810100 -2.341000
O40 -0.114300 +2.394000
O41 0.244000 +1.493000
O42 0.207000 +1.493000
O43 -0.810100 -2.341000
O44 -0.114300 +2.394000
O45 0.244000 +1.493000
O46 0.207000 +1.493000
O47 -0.810100 -2.341000
O48 -0.114300 +2.394000
O49 0.244000 +1.493000
O50 0.207000 +1.493000
O51 -0.810100 -2.341000
O52 -0.114300 +2.394000
O53 0.244000 +1.493000
O54 0.207000 +1.493000
O55 -0.810100 -2.341000
O56 -0.114300 +2.394000
O57 0.244000 +1.493000
O58 0.207000 +1.493000
O59 -0.810100 -2.341000
O60 -0.114300 +2.394000
O61 0.244000 +1.493000
O62 0.207000 +1.493000
O63 -0.810100 -2.341000
O64 -0.114300 +2.394000
O65 0.244000 +1.493000
O66 0.207000 +1.493000
O67 -0.810100 -2.341000
O68 -0.114300 +2.394000
O69 0.244000 +1.493000
O70 0.207000 +1.493000
O71 -0.810100 -2.341000
O72 -0.114300 +2.394000
O73 0.244000 +1.493000
O74 0.207000 +1.493000
O75 -0.810100 -2.341000
O76 -0.114300 +2.394000
O77 0.244000 +1.493000
```

SambVca@Phd.tusc

```
C1 0.244000 +1.493000
C2 0.207000 +1.493000
C3 -0.810100 -2.341000
C4 -0.114300 +2.394000
```

---

**Atoms and radius in the parameter file**  
Atom and radius in the parameter file

| Atom | radius |
|------|--------|
| C    | 1.70   |
| O    | 1.52   |
| N    | 1.55   |
| H    | 0.93   |
| Cl   | 1.75   |
| Ir   | 1.43   |
| Co   | 1.43   |
| Ni   | 1.43   |
| Cr   | 1.43   |
| Mn   | 1.43   |
| Fe   | 1.43   |
| Co   | 1.43   |
| Ni   | 1.43   |
| Cr   | 1.43   |
| Mn   | 1.43   |
| Fe   | 1.43   |

---

**Coordinates scaled to put the metal at the origin**  
Coordinates scaled to put the metal at the origin

|    |         |         |
|----|---------|---------|
| C  | -0.1144 | 1.9962  |
| O  | 0.2440  | -0.4568 |
| N  | 0.2070  | -0.4568 |
| H  | 0.2440  | -0.4568 |
| Cl | 0.2070  | -0.4568 |
| Ir | 0.0000  | 0.0000  |
| Co | -0.1144 | 1.9962  |
| Ni | -0.1144 | 1.9962  |
| Cr | -0.1144 | 1.9962  |
| Mn | -0.1144 | 1.9962  |
| Fe | -0.1144 | 1.9962  |
| Co | -0.1144 | 1.9962  |
| Ni | -0.1144 | 1.9962  |
| Cr | -0.1144 | 1.9962  |
| Mn | -0.1144 | 1.9962  |
| Fe | -0.1144 | 1.9962  |

SambVca@Phd.tusc

```
C1 0.244000 +1.493000
C2 0.207000 +1.493000
C3 -0.810100 -2.341000
C4 -0.114300 +2.394000
C5 0.244000 +1.493000
C6 0.207000 +1.493000
C7 -0.810100 -2.341000
C8 -0.114300 +2.394000
C9 0.244000 +1.493000
C10 0.207000 +1.493000
C11 -0.810100 -2.341000
C12 -0.114300 +2.394000
C13 0.244000 +1.493000
C14 0.207000 +1.493000
C15 -0.810100 -2.341000
C16 -0.114300 +2.394000
C17 0.244000 +1.493000
C18 0.207000 +1.493000
C19 -0.810100 -2.341000
C20 -0.114300 +2.394000
C21 0.244000 +1.493000
C22 0.207000 +1.493000
C23 -0.810100 -2.341000
C24 -0.114300 +2.394000
C25 0.244000 +1.493000
C26 0.207000 +1.493000
C27 -0.810100 -2.341000
C28 -0.114300 +2.394000
C29 0.244000 +1.493000
C30 0.207000 +1.493000
C31 -0.810100 -2.341000
C32 -0.114300 +2.394000
C33 0.244000 +1.493000
C34 0.207000 +1.493000
C35 -0.810100 -2.341000
C36 -0.114300 +2.394000
C37 0.244000 +1.493000
C38 0.207000 +1.493000
C39 -0.810100 -2.341000
C40 -0.114300 +2.394000
C41 0.244000 +1.493000
C42 0.207000 +1.493000
C43 -0.810100 -2.341000
C44 -0.114300 +2.394000
C45 0.244000 +1.493000
C46 0.207000 +1.493000
C47 -0.810100 -2.341000
C48 -0.114300 +2.394000
C49 0.244000 +1.493000
C50 0.207000 +1.493000
C51 -0.810100 -2.341000
C52 -0.114300 +2.394000
C53 0.244000 +1.493000
C54 0.207000 +1.493000
C55 -0.810100 -2.341000
C56 -0.114300 +2.394000
C57 0.244000 +1.493000
C58 0.207000 +1.493000
C59 -0.810100 -2.341000
C60 -0.114300 +2.394000
C61 0.244000 +1.493000
C62 0.207000 +1.493000
C63 -0.810100 -2.341000
C64 -0.114300 +2.394000
C65 0.244000 +1.493000
C66 0.207000 +1.493000
C67 -0.810100 -2.341000
C68 -0.114300 +2.394000
C69 0.244000 +1.493000
C70 0.207000 +1.493000
C71 -0.810100 -2.341000
C72 -0.114300 +2.394000
C73 0.244000 +1.493000
C74 0.207000 +1.493000
C75 -0.810100 -2.341000
C76 -0.114300 +2.394000
C77 0.244000 +1.493000
```

SambVca@Phd.tusc

```
O1 0.244000 +1.493000
O2 0.207000 +1.493000
O3 -0.810100 -2.341000
O4 -0.114300 +2.394000
O5 0.244000 +1.493000
O6 0.207000 +1.493000
O7 -0.810100 -2.341000
O8 -0.114300 +2.394000
O9 0.244000 +1.493000
O10 0.207000 +1.493000
O11 -0.810100 -2.341000
O12 -0.114300 +2.394000
O13 0.244000 +1.493000
O14 0.207000 +1.493000
O15 -0.810100 -2.341000
O16 -0.114300 +2.394000
O17 0.244000 +1.493000
O18 0.207000 +1.493000
O19 -0.810100 -2.341000
O20 -0.114300 +2.394000
O21 0.244000 +1.493000
O22 0.207000 +1.493000
O23 -0.810100 -2.341000
O24 -0.114300 +2.394000
O25 0.244000 +1.493000
O26 0.207000 +1.493000
O27 -0.810100 -2.341000
O28 -0.114300 +2.394000
O29 0.244000 +1.493000
O30 0.207000 +1.493000
O31 -0.810100 -2.341000
O32 -0.114300 +2.394000
O33 0.244000 +1.493000
O34 0.207000 +1.493000
O35 -0.810100 -2.341000
O36 -0.114300 +2.394000
O37 0.244000 +1.493000
O38 0.207000 +1.493000
O39 -0.810100 -2.341000
O40 -0.114300 +2.394000
O41 0.244000 +1.493000
O42 0.207000 +1.493000
O43 -0.810100 -2.341000
O44 -0.114300 +2.394000
O45 0.244000 +1.493000
O46 0.207000 +1.493000
O47 -0.810100 -2.341000
O48 -0.114300 +2.394000
O49 0.244000 +1.493000
O50 0.207000 +1.493000
O51 -0.810100 -2.341000
O52 -0.114300 +2.394000
O53 0.244000 +1.493000
O54 0.207000 +1.493000
O55 -0.810100 -2.341000
O56 -0.114300 +2.394000
O57 0.244000 +1.493000
O58 0.207000 +1.493000
O59 -0.810100 -2.341000
O60 -0.114300 +2.394000
O61 0.244000 +1.493000
O62 0.207000 +1.493000
O63 -0.810100 -2.341000
O64 -0.114300 +2.394000
O65 0.244000 +1.493000
O66 0.207000 +1.493000
O67 -0.810100 -2.341000
O68 -0.114300 +2.394000
O69 0.244000 +1.493000
O70 0.207000 +1.493000
O71 -0.810100 -2.341000
O72 -0.114300 +2.394000
O73 0.244000 +1.493000
O74 0.207000 +1.493000
O75 -0.810100 -2.341000
O76 -0.114300 +2.394000
O77 0.244000 +1.493000
```

SambVca@Phd.tusc

**Results : Volume in Angs^3**

Results : Volume in Angs^3

| N of voxels examined : | 1436277   |         |         |
|------------------------|-----------|---------|---------|
| Volume of voxel :      | 0.1256-03 |         |         |
| V Free                 | V Buried  | V Total | V Empty |
| 109.683                | 70.473    | 179.550 | 179.594 |

---

| VV Free | VV Bur | % Tot/Free |
|---------|--------|------------|
| 60.634  | 39.364 | 99.997     |

---

The VV\_Bur of your molecule is: 39.4

File:///C:/Documents and Settings/George Fortman/Desktop/Naica/1/NC/CF/Naica/Naica/1/1 - sambVca\_result.php.htm(12/20/2010 12:13:30 PM)

# cis-Ir(IMes)(CO)<sub>2</sub>Cl

SambVca@Mol.NaC

**SambVca @ Mol.NaC**  
Results page

---

S A M B V C A  
Results Volume in Parameter  
http://www.molnac.univ-lille.fr/~SambVca  
L. Cavalie et al., email: lorcavalie@univ-lille.fr

---

**Molecule from input :**  
Molecule from input :  
-rsmpt076.777258338555867512635749c.csd

Number of atoms : 47  
Atom type in formula defined : 5  
Atom type within the mol : 5  
ID of these atoms : 44 47

Radius of sphere (Angst) : 3.500  
Distance from sphere (Angst) : 2.000  
Mesh step (Angst) : 0.250  
N atoms included in the V\_Bur calculation

---

**Cartesian coordinates from input :**  
Cartesian coordinates from input :  
C1 1.488400 -4.300000  
C2 2.160200 0.700000 -4.460000  
C3 -1.441000 0.300000 -4.430000  
C4 2.388000

file:///C:/Documents and Settings/George Fortman/Desktop/NaCv/ NCC/CE/NaCv/NaCv.htm#(12/20/03 12:14:47 PM)

SambVca@Mol.NaC

|     |           |           |           |
|-----|-----------|-----------|-----------|
| C1  | 1.488400  | -4.300000 | -0.700000 |
| C2  | 2.160200  | 0.700000  | -4.460000 |
| C3  | -1.441000 | 0.300000  | -4.430000 |
| C4  | 2.388000  |           |           |
| C5  | 1.199400  | -5.740000 |           |
| C6  | 1.101000  | -1.200000 | -4.220000 |
| C7  | 2.428000  |           |           |
| C8  | -1.589000 | -4.480000 |           |
| C9  | 1.199400  | -5.740000 | -4.690000 |
| C10 | 1.101000  | -1.200000 | -4.690000 |
| C11 | 2.428000  |           |           |
| C12 | 0.387000  | -7.430000 |           |
| C13 | 1.747000  | -4.470000 | -4.690000 |
| C14 | 1.192000  | 1.800000  | -4.460000 |
| C15 | 2.109000  |           |           |
| C16 | 1.192000  | -7.430000 | -4.690000 |
| C17 | 1.747000  | -4.470000 | -4.690000 |
| C18 | 2.109000  |           |           |
| C19 | 0.387000  | -7.430000 | -4.690000 |
| C20 | 1.747000  | -4.470000 | -4.690000 |
| C21 | 2.109000  |           |           |
| C22 | 1.192000  | 1.800000  | -4.460000 |
| C23 | 1.192000  | -7.430000 | -4.690000 |
| C24 | 1.747000  | -4.470000 | -4.690000 |
| C25 | 2.109000  |           |           |
| C26 | 1.192000  | 1.800000  | -4.460000 |
| C27 | 1.192000  | -7.430000 | -4.690000 |
| C28 | 1.747000  | -4.470000 | -4.690000 |
| C29 | 2.109000  |           |           |
| C30 | 1.192000  | 1.800000  | -4.460000 |
| C31 | 1.192000  | -7.430000 | -4.690000 |
| C32 | 1.747000  | -4.470000 | -4.690000 |
| C33 | 2.109000  |           |           |
| C34 | 1.192000  | 1.800000  | -4.460000 |
| C35 | 1.192000  | -7.430000 | -4.690000 |
| C36 | 1.747000  | -4.470000 | -4.690000 |
| C37 | 2.109000  |           |           |
| C38 | 1.192000  | 1.800000  | -4.460000 |
| C39 | 1.192000  | -7.430000 | -4.690000 |
| C40 | 1.747000  | -4.470000 | -4.690000 |
| C41 | 2.109000  |           |           |
| C42 | 1.192000  | 1.800000  | -4.460000 |
| C43 | 1.192000  | -7.430000 | -4.690000 |
| C44 | 1.747000  | -4.470000 | -4.690000 |
| C45 | 2.109000  |           |           |
| C46 | 1.192000  | 1.800000  | -4.460000 |
| C47 | 1.192000  | -7.430000 | -4.690000 |

file:///C:/Documents and Settings/George Fortman/Desktop/NaCv/ NCC/CE/NaCv/NaCv.htm#(12/20/03 12:14:47 PM)

SambVca@Mol.NaC

|     |           |           |           |
|-----|-----------|-----------|-----------|
| C1  | 1.488400  | -4.300000 | -0.700000 |
| C2  | 2.160200  | 0.700000  | -4.460000 |
| C3  | -1.441000 | 0.300000  | -4.430000 |
| C4  | 2.388000  |           |           |
| C5  | 1.199400  | -5.740000 |           |
| C6  | 1.101000  | -1.200000 | -4.220000 |
| C7  | 2.428000  |           |           |
| C8  | -1.589000 | -4.480000 |           |
| C9  | 1.199400  | -5.740000 | -4.690000 |
| C10 | 1.101000  | -1.200000 | -4.690000 |
| C11 | 2.428000  |           |           |
| C12 | 0.387000  | -7.430000 |           |
| C13 | 1.747000  | -4.470000 | -4.690000 |
| C14 | 1.192000  | 1.800000  | -4.460000 |
| C15 | 2.109000  |           |           |
| C16 | 1.192000  | -7.430000 | -4.690000 |
| C17 | 1.747000  | -4.470000 | -4.690000 |
| C18 | 2.109000  |           |           |
| C19 | 0.387000  | -7.430000 | -4.690000 |
| C20 | 1.747000  | -4.470000 | -4.690000 |
| C21 | 2.109000  |           |           |
| C22 | 1.192000  | 1.800000  | -4.460000 |
| C23 | 1.192000  | -7.430000 | -4.690000 |
| C24 | 1.747000  | -4.470000 | -4.690000 |
| C25 | 2.109000  |           |           |
| C26 | 1.192000  | 1.800000  | -4.460000 |
| C27 | 1.192000  | -7.430000 | -4.690000 |
| C28 | 1.747000  | -4.470000 | -4.690000 |
| C29 | 2.109000  |           |           |
| C30 | 1.192000  | 1.800000  | -4.460000 |
| C31 | 1.192000  | -7.430000 | -4.690000 |
| C32 | 1.747000  | -4.470000 | -4.690000 |
| C33 | 2.109000  |           |           |
| C34 | 1.192000  | 1.800000  | -4.460000 |
| C35 | 1.192000  | -7.430000 | -4.690000 |
| C36 | 1.747000  | -4.470000 | -4.690000 |
| C37 | 2.109000  |           |           |
| C38 | 1.192000  | 1.800000  | -4.460000 |
| C39 | 1.192000  | -7.430000 | -4.690000 |
| C40 | 1.747000  | -4.470000 | -4.690000 |
| C41 | 2.109000  |           |           |
| C42 | 1.192000  | 1.800000  | -4.460000 |
| C43 | 1.192000  | -7.430000 | -4.690000 |
| C44 | 1.747000  | -4.470000 | -4.690000 |
| C45 | 2.109000  |           |           |
| C46 | 1.192000  | 1.800000  | -4.460000 |
| C47 | 1.192000  | -7.430000 | -4.690000 |

file:///C:/Documents and Settings/George Fortman/Desktop/NaCv/ NCC/CE/NaCv/NaCv.htm#(12/20/03 12:14:47 PM)

SambVca@Mol.NaC

|     |           |           |           |
|-----|-----------|-----------|-----------|
| C1  | 1.488400  | -4.300000 | -0.700000 |
| C2  | 2.160200  | 0.700000  | -4.460000 |
| C3  | -1.441000 | 0.300000  | -4.430000 |
| C4  | 2.388000  |           |           |
| C5  | 1.199400  | -5.740000 |           |
| C6  | 1.101000  | -1.200000 | -4.220000 |
| C7  | 2.428000  |           |           |
| C8  | -1.589000 | -4.480000 |           |
| C9  | 1.199400  | -5.740000 | -4.690000 |
| C10 | 1.101000  | -1.200000 | -4.690000 |
| C11 | 2.428000  |           |           |
| C12 | 0.387000  | -7.430000 |           |
| C13 | 1.747000  | -4.470000 | -4.690000 |
| C14 | 1.192000  | 1.800000  | -4.460000 |
| C15 | 2.109000  |           |           |
| C16 | 1.192000  | -7.430000 | -4.690000 |
| C17 | 1.747000  | -4.470000 | -4.690000 |
| C18 | 2.109000  |           |           |
| C19 | 0.387000  | -7.430000 | -4.690000 |
| C20 | 1.747000  | -4.470000 | -4.690000 |
| C21 | 2.109000  |           |           |
| C22 | 1.192000  | 1.800000  | -4.460000 |
| C23 | 1.192000  | -7.430000 | -4.690000 |
| C24 | 1.747000  | -4.470000 | -4.690000 |
| C25 | 2.109000  |           |           |
| C26 | 1.192000  | 1.800000  | -4.460000 |
| C27 | 1.192000  | -7.430000 | -4.690000 |
| C28 | 1.747000  | -4.470000 | -4.690000 |
| C29 | 2.109000  |           |           |
| C30 | 1.192000  | 1.800000  | -4.460000 |
| C31 | 1.192000  | -7.430000 | -4.690000 |
| C32 | 1.747000  | -4.470000 | -4.690000 |
| C33 | 2.109000  |           |           |
| C34 | 1.192000  | 1.800000  | -4.460000 |
| C35 | 1.192000  | -7.430000 | -4.690000 |
| C36 | 1.747000  | -4.470000 | -4.690000 |
| C37 | 2.109000  |           |           |
| C38 | 1.192000  | 1.800000  | -4.460000 |
| C39 | 1.192000  | -7.430000 | -4.690000 |
| C40 | 1.747000  | -4.470000 | -4.690000 |
| C41 | 2.109000  |           |           |
| C42 | 1.192000  | 1.800000  | -4.460000 |
| C43 | 1.192000  | -7.430000 | -4.690000 |
| C44 | 1.747000  | -4.470000 | -4.690000 |
| C45 | 2.109000  |           |           |
| C46 | 1.192000  | 1.800000  | -4.460000 |
| C47 | 1.192000  | -7.430000 | -4.690000 |

file:///C:/Documents and Settings/George Fortman/Desktop/NaCv/ NCC/CE/NaCv/NaCv.htm#(12/20/03 12:14:47 PM)

SambVca@Mol.NaC

|     |           |           |           |
|-----|-----------|-----------|-----------|
| C1  | 1.488400  | -4.300000 | -0.700000 |
| C2  | 2.160200  | 0.700000  | -4.460000 |
| C3  | -1.441000 | 0.300000  | -4.430000 |
| C4  | 2.388000  |           |           |
| C5  | 1.199400  | -5.740000 |           |
| C6  | 1.101000  | -1.200000 | -4.220000 |
| C7  | 2.428000  |           |           |
| C8  | -1.589000 | -4.480000 |           |
| C9  | 1.199400  | -5.740000 | -4.690000 |
| C10 | 1.101000  | -1.200000 | -4.690000 |
| C11 | 2.428000  |           |           |
| C12 | 0.387000  | -7.430000 |           |
| C13 | 1.747000  | -4.470000 | -4.690000 |
| C14 | 1.192000  | 1.800000  | -4.460000 |
| C15 | 2.109000  |           |           |
| C16 | 1.192000  | -7.430000 | -4.690000 |
| C17 | 1.747000  | -4.470000 | -4.690000 |
| C18 | 2.109000  |           |           |
| C19 | 0.387000  | -7.430000 | -4.690000 |
| C20 | 1.747000  | -4.470000 | -4.690000 |
| C21 | 2.109000  |           |           |
| C22 | 1.192000  | 1.800000  | -4.460000 |
| C23 | 1.192000  | -7.430000 | -4.690000 |
| C24 | 1.747000  | -4.470000 | -4.690000 |
| C25 | 2.109000  |           |           |
| C26 | 1.192000  | 1.800000  | -4.460000 |
| C27 | 1.192000  | -7.430000 | -4.690000 |
| C28 | 1.747000  | -4.470000 | -4.690000 |
| C29 | 2.109000  |           |           |
| C30 | 1.192000  | 1.800000  | -4.460000 |
| C31 | 1.192000  | -7.430000 | -4.690000 |
| C32 | 1.747000  | -4.470000 | -4.690000 |
| C33 | 2.109000  |           |           |
| C34 | 1.192000  | 1.800000  | -4.460000 |
| C35 | 1.192000  | -7.430000 | -4.690000 |
| C36 | 1.747000  | -4.470000 | -4.690000 |
| C37 | 2.109000  |           |           |
| C38 | 1.192000  | 1.800000  | -4.460000 |
| C39 | 1.192000  | -7.430000 | -4.690000 |
| C40 | 1.747000  | -4.470000 | -4.690000 |
| C41 | 2.109000  |           |           |
| C42 | 1.192000  | 1.800000  | -4.460000 |
| C43 | 1.192000  | -7.430000 | -4.690000 |
| C44 | 1.747000  | -4.470000 | -4.690000 |
| C45 | 2.109000  |           |           |
| C46 | 1.192000  | 1.800000  | -4.460000 |
| C47 | 1.192000  | -7.430000 | -4.690000 |

file:///C:/Documents and Settings/George Fortman/Desktop/NaCv/ NCC/CE/NaCv/NaCv.htm#(12/20/03 12:14:47 PM)

**Table S1.** Crystallographic data for *cis*-Pt(NHC)<sub>2</sub>Me<sub>2</sub> (NHC = ICy<sup>7</sup>, ICy<sup>8</sup>, ICy<sup>12</sup>) complexes.

| Compound reference                                                            | <i>cis</i> -Pt(ICy <sup>7</sup> ) <sub>2</sub> Me <sub>2</sub> ( <b>3e</b> ) | <i>cis</i> -Pt(ICy <sup>8</sup> ) <sub>2</sub> Me <sub>2</sub> ( <b>3f</b> ) | <i>cis</i> -Pt(ICy <sup>12</sup> ) <sub>2</sub> Me <sub>2</sub> ( <b>3g</b> )                   |
|-------------------------------------------------------------------------------|------------------------------------------------------------------------------|------------------------------------------------------------------------------|-------------------------------------------------------------------------------------------------|
| Chemical formula                                                              | C <sub>36</sub> H <sub>62</sub> N <sub>4</sub> Pt                            | C <sub>40</sub> H <sub>70</sub> N <sub>4</sub> Pt                            | C <sub>56</sub> H <sub>102</sub> N <sub>4</sub> Pt•C <sub>4</sub> H <sub>8</sub> O <sub>2</sub> |
| Formula Mass                                                                  | 745.99                                                                       | 802.09                                                                       | 1114.61                                                                                         |
| CCDC number                                                                   | 762962                                                                       | 762961                                                                       | 762963                                                                                          |
| Crystal system                                                                | Orthorhombic                                                                 | Orthorhombic                                                                 | Monoclinic                                                                                      |
| <i>a</i> /Å                                                                   | 19.481(4)                                                                    | 12.924(3)                                                                    | 17.712(5)                                                                                       |
| <i>b</i> /Å                                                                   | 15.267(3)                                                                    | 14.532(3)                                                                    | 15.351(4)                                                                                       |
| <i>c</i> /Å                                                                   | 22.882(5)                                                                    | 19.717(4)                                                                    | 23.005(7)                                                                                       |
| $\alpha$ /°                                                                   | 90.00                                                                        | 90.00                                                                        | 90.00                                                                                           |
| $\beta$ /°                                                                    | 90.00                                                                        | 90.00                                                                        | 111.436(7)                                                                                      |
| $\gamma$ /°                                                                   | 90.00                                                                        | 90.00                                                                        | 90.00                                                                                           |
| Unit cell volume/Å <sup>3</sup>                                               | 6806(2)                                                                      | 3703.3(14)                                                                   | 5822(3)                                                                                         |
| Temperature/K                                                                 | 93(2)                                                                        | 93(2)                                                                        | 93(2)                                                                                           |
| Space group                                                                   | <i>Pbca</i>                                                                  | <i>P2(1)2(1)2(1)</i>                                                         | <i>P2(1)/n</i>                                                                                  |
| No. of formula units per unit cell, <i>Z</i>                                  | 8                                                                            | 4                                                                            | 4                                                                                               |
| Absorption coefficient, $\mu$ /mm <sup>-1</sup>                               | 4.153                                                                        | 3.822                                                                        | 2.453                                                                                           |
| No. of reflections measured                                                   | 41103                                                                        | 23569                                                                        | 36606                                                                                           |
| No. of independent reflections                                                | 6210                                                                         | 6756                                                                         | 10549                                                                                           |
| <i>R</i> <sub>int</sub>                                                       | 0.1494                                                                       | 0.0764                                                                       | 0.1599                                                                                          |
| Final <i>R</i> <sub><i>I</i></sub> values ( <i>I</i> > 2σ( <i>I</i> ))        | 0.0582                                                                       | 0.0408                                                                       | 0.0641                                                                                          |
| Final <i>wR</i> ( <i>F</i> <sup>2</sup> ) values ( <i>I</i> > 2σ( <i>I</i> )) | 0.1034                                                                       | 0.0651                                                                       | 0.1005                                                                                          |
| Final <i>R</i> <sub><i>I</i></sub> values (all data)                          | 0.1082                                                                       | 0.0486                                                                       | 0.1321                                                                                          |
| Final <i>wR</i> ( <i>F</i> <sup>2</sup> ) values (all data)                   | 0.1191                                                                       | 0.0680                                                                       | 0.1192                                                                                          |

**Table S2.** Crystallographic data for *cis*-Ir(NHC)(CO)<sub>2</sub>Cl (NHC = ICy<sup>8</sup>, ICy<sup>12</sup>) complexes.

| Compound reference                                                            | <i>cis</i> -Ir(ICy <sup>8</sup> )(CO) <sub>2</sub> Cl<br>( <b>6f</b> ) | <i>cis</i> -Ir(ICy <sup>12</sup> )(CO) <sub>2</sub> Cl<br>( <b>6g</b> ) |
|-------------------------------------------------------------------------------|------------------------------------------------------------------------|-------------------------------------------------------------------------|
| Chemical formula                                                              | C <sub>21</sub> H <sub>32</sub> ClIrN <sub>2</sub> O <sub>2</sub>      | C <sub>29</sub> H <sub>48</sub> ClIrN <sub>2</sub> O <sub>2</sub>       |
| Formula Mass                                                                  | 572.14                                                                 | 684.34                                                                  |
| CCDC number                                                                   | 762964                                                                 | 762965                                                                  |
| Crystal system                                                                | Orthorhombic                                                           | Triclinic                                                               |
| <i>a</i> /Å                                                                   | 17.878(6)                                                              | 7.815(4)                                                                |
| <i>b</i> /Å                                                                   | 19.052(6)                                                              | 9.552(5)                                                                |
| <i>c</i> /Å                                                                   | 13.392(4)                                                              | 20.760(9)                                                               |
| <i>α</i> /°                                                                   | 90.00                                                                  | 92.160(9)                                                               |
| <i>β</i> /°                                                                   | 90.00                                                                  | 92.229(10)                                                              |
| <i>γ</i> /°                                                                   | 90.00                                                                  | 111.059(15)                                                             |
| Unit cell volume/Å <sup>3</sup>                                               | 4561(2)                                                                | 1442.8(12)                                                              |
| Temperature/K                                                                 | 93(2)                                                                  | 93(2)                                                                   |
| Space group                                                                   | <i>Pccn</i>                                                            | <i>P1</i>                                                               |
| No. of formula units per unit cell, <i>Z</i>                                  | 8                                                                      | 2                                                                       |
| Absorption coefficient, <i>μ</i> /mm <sup>-1</sup>                            | 5.988                                                                  | 4.747                                                                   |
| No. of reflections measured                                                   | 27093                                                                  | 9296                                                                    |
| No. of independent reflections                                                | 4135                                                                   | 5089                                                                    |
| <i>R</i> <sub>int</sub>                                                       | 0.1448                                                                 | 0.0837                                                                  |
| Final <i>R</i> <sub><i>I</i></sub> values ( <i>I</i> > 2σ( <i>I</i> ))        | 0.0821                                                                 | 0.0681                                                                  |
| Final <i>wR</i> ( <i>F</i> <sup>2</sup> ) values ( <i>I</i> > 2σ( <i>I</i> )) | 0.1559                                                                 | 0.1215                                                                  |
| Final <i>R</i> <sub><i>I</i></sub> values (all data)                          | 0.1330                                                                 | 0.1059                                                                  |
| Final <i>wR</i> ( <i>F</i> <sup>2</sup> ) values (all data)                   | 0.1745                                                                 | 0.1375                                                                  |
